# Supplementary material for: Quantifying Emission Factors and Setting Conditions of Use According to ECHA Chapter R.14 for a Spray Process Designed for Nanocoatings—A Case Study
Source: MDPI journal article supplement (doi:10.3390/nano12040596), 2022-02-10

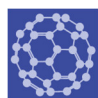

## Supplementary Material 1

# Quantifying Emission Factors and Setting Conditions of Use According to ECHA Chapter R.14 for a Spray Process Designed for Nanocoatings—A Case Study

Antti Joonas Koivisto <sup>1,2,3,\*</sup>, Benedetta Del Secco <sup>4</sup>, Sara Trabucco <sup>4</sup>, Alessia Nicosia <sup>4</sup>, Fabrizio Ravegnani <sup>4</sup>, Marko Altin <sup>5</sup>, Joan Cabellos <sup>6</sup>, Irini Furxhi <sup>7,8</sup>, Magda Blosi <sup>9</sup>, Anna Costa <sup>9</sup>, Jesús Lopez de Ipiña <sup>10</sup> and Franco Belosi <sup>4</sup>

<sup>1</sup> Air Pollution Management APM, Mattilanmäki 38, 33610 Tampere, Finland

<sup>2</sup> Institute for Atmospheric and Earth System Research (INAR), University of Helsinki, PL 64, FI-00014 Helsinki, Finland

<sup>3</sup> ARCHE Consulting, Liefkensstraat 35D, B-9032 Wondelgem, Belgium

<sup>4</sup> CNR-ISAC, Institute of Atmospheric Sciences and Climate, National Research Council of Italy, Via Gobetti, 101, 40129 Bologna, Italy; b.delsecco@isac.cnr.it (B.D.S.); s.trabucco@isac.cnr.it (S.T.); a.nicosia@isac.cnr.it (A.N.); f.ravegnani@isac.cnr.it (F.R.); f.belosi@isac.cnr.it (F.B.)

<sup>5</sup> Witek srl, Via Siena 47, 50142 Firenze, Italy; marko.altin@witekgroup.com

<sup>6</sup> Leitat Technological Center, c/de la Innovació 2, Terrassa, 08225 Barcelona, Spain; jcabellos@leitat.org

<sup>7</sup> Transgero Limited, Cullinagh, Newcastle West, Co. Limerick, V42 V384 Limerick, Ireland; irini.furxhi@transgero.eu

<sup>8</sup> Department of Accounting and Finance, Kemmy Business School, University of Limerick, V94 T9PX Limerick, Ireland

<sup>9</sup> ISTECCNR, Institute of Science and Technology for Ceramics, CNR, National Research Council, Via Granarolo 64, 48018 Faenza, Italy; magda.blosi@istec.cnr.it (M.B.), anna.costa@istec.cnr.it (A.C.)

<sup>10</sup> Basque Research and Technology Alliance (BRTA), Consiglo Nazionale delle Ricerche, Parque Tecnológico de Alava, Leonardo Da Vinci 11, 01510 Miñano, Spain; jesus.lopezdeipina@tecnalia.com (J.L.d.I.)

\* Correspondence: joonas.apm@gmail.com; Tel: +358-407-222-029

**TEXT S1: Near-field volume**

---

Version: TEAS 2019 (Version 1.0)

Date: 5/5/2021 11:22:04 AM

Prediction Model: Near Field Volume

| Variable    | Units | Variable Model            |
|-------------|-------|---------------------------|
| Side Length | m     | ~ Triangular (1.5, 1, 2 ) |

Near Field Shape: Cube (square box)

---

**STATISTICS**

---

Simulation N: 50000

## Non-parametric Statistics

Min: 1.009

Max: 7.982

Median: 3.373

Mode: 3.171

X0.05: 1.564

X0.95: 6.243

## Normal Distribution Statistics

Mean: 3.563

SD: 1.414

X0.05: 1.237

X0.95: 5.889

## Lognormal Distribution Statistics

GM: 3.282

GSD: 1.514

Mode: 2.763

X0.05: 1.659

X0.95: 6.492

---

**GRAPHS**

---

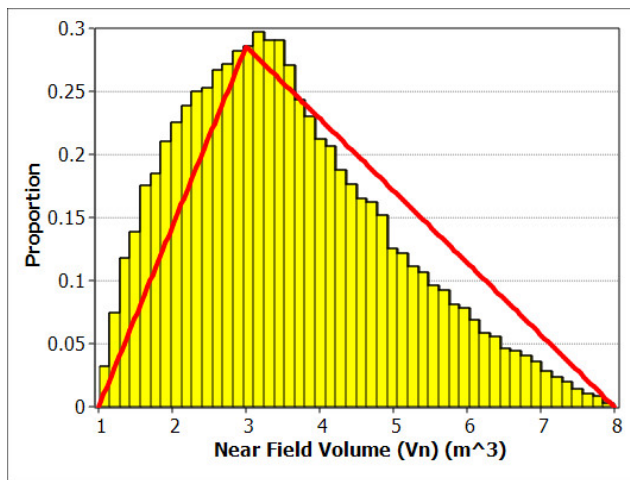

---

#### APPROXIMATE STATISTICAL MODEL

---

$V_N \sim \text{Triangular}(3.0, 1.00, 8) m^3$

---

#### NOTES

---

#### SOURCE:

-Nicas (2009): Chapter 6 - The Near Field/Far Field (Two Box) Model with a Constant Contaminant Emission Rate. in Mathematical Models for Estimating Occupational Exposure to Chemical, 2nd Edition. AIHA.

#### NOTES:

1. Box - the worker is assumed to be standing at the front.
2.  $\text{Beta} = 1/2 * (\text{Free Surface Area}) * S$
3. Free Surface Area does not include the blocked surfaces.

## TEXT S2: Near-field flowrate

---

Version: TEAS 2019 (Version 1.0)

Date: 5/5/2021 11:45:19 AM

Prediction Model: Near Field Flowrate ( $\beta$ )

| Variable     | Units | Variable Model                 |
|--------------|-------|--------------------------------|
| Side Length  | m     | ~ Triangular (1.5, 1, 2 )      |
| Air Velocity | m/min | ~ Triangular (0.9, 0.45, 1.8 ) |

Near Field Shape: Cube (square box)

Blocked Sides: Side

---

### STATISTICS

---

Simulation N: 50000

#### Non-parametric Statistics

Min: 1.293  
 Max: 16.874  
 Median: 5.666  
 Mode: 4.876  
 X0.05: 2.858  
 X0.95: 10.383

#### Normal Distribution Statistics

Mean: 6.017  
 SD: 2.318  
 X0.05: 2.203  
 X0.95: 9.831

#### Lognormal Distribution Statistics

GM: 5.588  
 GSD: 1.477  
 Mode: 4.800  
 X0.05: 2.943  
 X0.95: 10.612

---

---

## GRAPHS

---

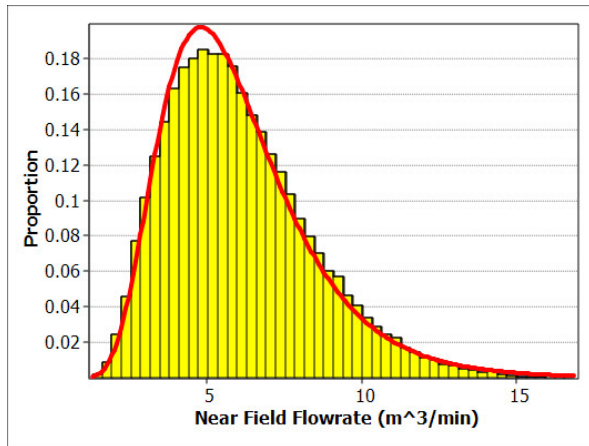

---

## APPROXIMATE STATISTICAL MODEL

---

Beta ~ Lognormal( 5.588, 1.477) m<sup>3</sup>/min

---

---

## NOTES

---

### SOURCE:

-Nicas (2009): Chapter 6 - The Near Field/Far Field (Two Box) Model with a Constant Contaminant Emission Rate. in Mathematical Models for Estimating Occupational Exposure to Chemical, 2nd Edition. AIHA.

### NOTES:

1. Box - the worker is assumed to be standing at the front.
2.  $\text{Beta} = 1/2 * (\text{Free Surface Area}) * S$
3. Free Surface Area does not include the blocked surfaces.

### TEXT S3: TiO<sub>2</sub>-N Near-Field

Version: TEAS 2019 (Version 1.0)

Date: 6/24/2021 3:17:45 PM

#### SUBSTANCE INFORMATION

TiO<sub>2</sub>-N particles dispersed in EtOH (1% w/w). TiO<sub>2</sub> content of aerosol particles at NF was 44% according to the ICP-MS analysis of collected particles.

#### EXPOSURE LIMITS

| Limit value                | Type | Source    | Notes                                                                                |
|----------------------------|------|-----------|--------------------------------------------------------------------------------------|
| REL: 0.3 mg/m <sup>3</sup> | TWA  | NIOSH REL | Here concentrations are for total dust (44% is TiO <sub>2</sub> from the total dust) |

#### TASK INFORMATION

TASK 1 - Break

Description:

Model: M201

Model Name: 2Box.CE.Gv

Comments:

| Variable     | Variable Model           | Units          |
|--------------|--------------------------|----------------|
| 1: Frequency | ~ ConstantInt (1, , )    | /shift         |
| 2: Duration  | ~ UniformInt (18, 19, )  | min            |
| 3: G         | ~ Constant (0, , )       | mg/min         |
| 4: Q         | ~ Uniform (2.5, 10, )    | ACH            |
| 5: V         | ~ Uniform (1200, 1470, ) | m <sup>3</sup> |
| 6: Vn        | ~ Triangular (3, 1, 8 )  | m <sup>3</sup> |

|            |                              |                     |
|------------|------------------------------|---------------------|
| 7: $\beta$ | ~ Lognormal (5.588, 1.477, ) | m <sup>3</sup> /min |
| 8: tg      | ~ Constant (0, , )           | min                 |
| 9: t1      | ~ Constant (0, , )           | min                 |
| 10: t2     | ~ Constant (19, , )          | min                 |

## TASK 2 - T1

Description:

Model: M201

Model Name: 2Box.CE.Gv

| Variable     | Variable Model               | Units               |
|--------------|------------------------------|---------------------|
| 1: Frequency | ~ ConstantInt (4, , )        | /shift              |
| 2: Duration  | ~ UniformInt (7, 9, )        | min                 |
| 3: G         | ~ Constant (1.3, , )         | mg/min              |
| 4: Q         | ~ Uniform (2.5, 10, )        | ACH                 |
| 5: V         | ~ Uniform (1200, 1470, )     | m <sup>3</sup>      |
| 6: Vn        | ~ Triangular (3, 1, 8 )      | m <sup>3</sup>      |
| 7: $\beta$   | ~ Lognormal (5.588, 1.477, ) | m <sup>3</sup> /min |
| 8: tg        | ~ Constant (2, , )           | min                 |
| 9: t1        | ~ Constant (0, , )           | min                 |
| 10: t2       | ~ Constant (9, , )           | min                 |

## TASK 3 - Break

Description:

Model: M201

Model Name: 2Box.CE.Gv

| Variable     | Variable Model               | Units               |
|--------------|------------------------------|---------------------|
| 1: Frequency | ~ ConstantInt (1, , )        | /shift              |
| 2: Duration  | ~ UniformInt (18, 19, )      | min                 |
| 3: G         | ~ Constant (0, , )           | mg/min              |
| 4: Q         | ~ Uniform (2.5, 10, )        | ACH                 |
| 5: V         | ~ Uniform (1200, 1470, )     | m <sup>3</sup>      |
| 6: Vn        | ~ Triangular (3, 1, 8 )      | m <sup>3</sup>      |
| 7: $\beta$   | ~ Lognormal (5.588, 1.477, ) | m <sup>3</sup> /min |
| 8: tg        | ~ Constant (0, , )           | min                 |
| 9: t1        | ~ Constant (0, , )           | min                 |
| 10: t2       | ~ Constant (19, , )          | min                 |

## TASK 4 - T2

Description:

Model: M201

Model Name: 2Box.CE.Gv

| Variable     | Variable Model               | Units               |
|--------------|------------------------------|---------------------|
| 1: Frequency | ~ ConstantInt (4, , )        | /shift              |
| 2: Duration  | ~ UniformInt (7, 9, )        | min                 |
| 3: G         | ~ Constant (2, , )           | mg/min              |
| 4: Q         | ~ Uniform (2.5, 10, )        | ACH                 |
| 5: V         | ~ Uniform (1200, 1470, )     | m <sup>3</sup>      |
| 6: Vn        | ~ Triangular (3, 1, 8 )      | m <sup>3</sup>      |
| 7: β         | ~ Lognormal (5.588, 1.477, ) | m <sup>3</sup> /min |
| 8: tg        | ~ Constant (2, , )           | min                 |
| 9: t1        | ~ Constant (0, , )           | min                 |
| 10: t2       | ~ Constant (9, , )           | min                 |

## TASK 5 - Break

Description:

Model: M201

Model Name: 2Box.CE.Gv

| Variable     | Variable Model               | Units               |
|--------------|------------------------------|---------------------|
| 1: Frequency | ~ ConstantInt (1, , )        | /shift              |
| 2: Duration  | ~ UniformInt (18, 19, )      | min                 |
| 3: G         | ~ Constant (0, , )           | mg/min              |
| 4: Q         | ~ Uniform (2.5, 10, )        | ACH                 |
| 5: V         | ~ Uniform (1200, 1470, )     | m <sup>3</sup>      |
| 6: Vn        | ~ Triangular (3, 1, 8 )      | m <sup>3</sup>      |
| 7: β         | ~ Lognormal (5.588, 1.477, ) | m <sup>3</sup> /min |
| 8: tg        | ~ Constant (0, , )           | min                 |
| 9: t1        | ~ Constant (0, , )           | min                 |
| 10: t2       | ~ Constant (19, , )          | min                 |

## TASK 6 - T3

Description:

Model: M201

Model Name: 2Box.CE.Gv

| Variable     | Variable Model               | Units               |
|--------------|------------------------------|---------------------|
| 1: Frequency | ~ ConstantInt (4, , )        | /shift              |
| 2: Duration  | ~ UniformInt (7, 9, )        | min                 |
| 3: G         | ~ Constant (5.9, , )         | mg/min              |
| 4: Q         | ~ Uniform (2.5, 10, )        | ACH                 |
| 5: V         | ~ Uniform (1200, 1470, )     | m <sup>3</sup>      |
| 6: Vn        | ~ Triangular (3, 1, 8 )      | m <sup>3</sup>      |
| 7: β         | ~ Lognormal (5.588, 1.477, ) | m <sup>3</sup> /min |
| 8: tg        | ~ Uniform (2, 3, )           | min                 |
| 9: t1        | ~ Constant (0, , )           | min                 |
| 10: t2       | ~ Constant (9, , )           | min                 |

## TASK 7 - Break



Description:

Model: M201

Model Name: 2Box.CE.Gv

| Variable     | Variable Model               | Units               |
|--------------|------------------------------|---------------------|
| 1: Frequency | ~ ConstantInt (1, , )        | /shift              |
| 2: Duration  | ~ UniformInt (18, 19, )      | min                 |
| 3: G         | ~ Constant (0, , )           | mg/min              |
| 4: Q         | ~ Uniform (2.5, 10, )        | ACH                 |
| 5: V         | ~ Uniform (1200, 1470, )     | m <sup>3</sup>      |
| 6: Vn        | ~ Triangular (3, 1, 8 )      | m <sup>3</sup>      |
| 7: β         | ~ Lognormal (5.588, 1.477, ) | m <sup>3</sup> /min |
| 8: tg        | ~ Constant (0, , )           | min                 |
| 9: t1        | ~ Constant (0, , )           | min                 |
| 10: t2       | ~ Constant (19, , )          | min                 |

TASK 8 - T4

Description:

Model: M201

Model Name: 2Box.CE.Gv

| Variable     | Variable Model               | Units               |
|--------------|------------------------------|---------------------|
| 1: Frequency | ~ ConstantInt (4, , )        | /shift              |
| 2: Duration  | ~ UniformInt (7, 9, )        | min                 |
| 3: G         | ~ Constant (0.9, , )         | mg/min              |
| 4: Q         | ~ Uniform (2.5, 10, )        | ACH                 |
| 5: V         | ~ Uniform (1200, 1470, )     | m <sup>3</sup>      |
| 6: Vn        | ~ Triangular (3, 1, 8 )      | m <sup>3</sup>      |
| 7: β         | ~ Lognormal (5.588, 1.477, ) | m <sup>3</sup> /min |
| 8: tg        | ~ Constant (2, , )           | min                 |
| 9: t1        | ~ Constant (0, , )           | min                 |
| 10: t2       | ~ Constant (9, , )           | min                 |

TASK 9 - Break

Description:

Model: M201

Model Name: 2Box.CE.Gv

| Variable     | Variable Model               | Units               |
|--------------|------------------------------|---------------------|
| 1: Frequency | ~ ConstantInt (1, , )        | /shift              |
| 2: Duration  | ~ UniformInt (18, 19, )      | min                 |
| 3: G         | ~ Constant (0, , )           | mg/min              |
| 4: Q         | ~ Uniform (2.5, 10, )        | ACH                 |
| 5: V         | ~ Uniform (1200, 1470, )     | m <sup>3</sup>      |
| 6: Vn        | ~ Triangular (3, 1, 8 )      | m <sup>3</sup>      |
| 7: β         | ~ Lognormal (5.588, 1.477, ) | m <sup>3</sup> /min |

|        |                     |     |
|--------|---------------------|-----|
| 8: tg  | ~ Constant (0, , )  | min |
| 9: t1  | ~ Constant (0, , )  | min |
| 10: t2 | ~ Constant (19, , ) | min |

## TASK 10 - T5

Description:

Model: M201

Model Name: 2Box.CE.Gv

| Variable     | Variable Model               | Units               |
|--------------|------------------------------|---------------------|
| 1: Frequency | ~ ConstantInt (4, , )        | /shift              |
| 2: Duration  | ~ UniformInt (7, 9, )        | min                 |
| 3: G         | ~ Constant (1.6, , )         | mg/min              |
| 4: Q         | ~ Uniform (2.5, 10, )        | ACH                 |
| 5: V         | ~ Uniform (1200, 1470, )     | m <sup>3</sup>      |
| 6: Vn        | ~ Triangular (3, 1, 8 )      | m <sup>3</sup>      |
| 7: β         | ~ Lognormal (5.588, 1.477, ) | m <sup>3</sup> /min |
| 8: tg        | ~ Constant (2, , )           | min                 |
| 9: t1        | ~ Constant (0, , )           | min                 |
| 10: t2       | ~ Constant (9, , )           | min                 |

## TASK 11 - Break

Description:

Model: M201

Model Name: 2Box.CE.Gv

| Variable     | Variable Model               | Units               |
|--------------|------------------------------|---------------------|
| 1: Frequency | ~ ConstantInt (1, , )        | /shift              |
| 2: Duration  | ~ UniformInt (18, 19, )      | min                 |
| 3: G         | ~ Constant (0, , )           | mg/min              |
| 4: Q         | ~ Uniform (2.5, 10, )        | ACH                 |
| 5: V         | ~ Uniform (1200, 1470, )     | m <sup>3</sup>      |
| 6: Vn        | ~ Triangular (3, 1, 8 )      | m <sup>3</sup>      |
| 7: β         | ~ Lognormal (5.588, 1.477, ) | m <sup>3</sup> /min |
| 8: tg        | ~ Constant (0, , )           | min                 |
| 9: t1        | ~ Constant (0, , )           | min                 |
| 10: t2       | ~ Constant (19, , )          | min                 |

## TASK 12 - T6

Description:

Model: M201

Model Name: 2Box.CE.Gv

| Variable     | Variable Model        | Units  |
|--------------|-----------------------|--------|
| 1: Frequency | ~ ConstantInt (4, , ) | /shift |
| 2: Duration  | ~ UniformInt (7, 9, ) | min    |

|        |                              |                     |
|--------|------------------------------|---------------------|
| 3: G   | ~ Constant (4.5, , )         | mg/min              |
| 4: Q   | ~ Uniform (2.5, 10, )        | ACH                 |
| 5: V   | ~ Uniform (1200, 1470, )     | m <sup>3</sup>      |
| 6: Vn  | ~ Triangular (3, 1, 8 )      | m <sup>3</sup>      |
| 7: β   | ~ Lognormal (5.588, 1.477, ) | m <sup>3</sup> /min |
| 8: tg  | ~ Uniform (2, 3, )           | min                 |
| 9: t1  | ~ Constant (0, , )           | min                 |
| 10: t2 | ~ Constant (19, , )          | min                 |

## TASK 13 - Break

Description:

Model: M201

Model Name: 2Box.CE.Gv

| Variable     | Variable Model               | Units               |
|--------------|------------------------------|---------------------|
| 1: Frequency | ~ ConstantInt (1, , )        | /shift              |
| 2: Duration  | ~ UniformInt (18, 19, )      | min                 |
| 3: G         | ~ Constant (0, , )           | mg/min              |
| 4: Q         | ~ Uniform (2.5, 10, )        | ACH                 |
| 5: V         | ~ Uniform (1200, 1470, )     | m <sup>3</sup>      |
| 6: Vn        | ~ Triangular (3, 1, 8 )      | m <sup>3</sup>      |
| 7: β         | ~ Lognormal (5.588, 1.477, ) | m <sup>3</sup> /min |
| 8: tg        | ~ Constant (0, , )           | min                 |
| 9: t1        | ~ Constant (0, , )           | min                 |
| 10: t2       | ~ Constant (19, , )          | min                 |

## TWA CALCULATION (TASK OR FULL SHIFT)

Task TWA - the TWA is calculated for the duration of the task(s).

Comments:

## SIMULATION OPTIONS

Unless noted below, for all variables modeled with a statistical distribution a random value was generated for each repeat of a task.

#### Room Variables:

- For each TWA, the room ventilation rate  $Q$  generated for the first Box model task was used for all of the following Box model tasks.
- For each TWA, the room volume  $V$  generated for the first Box model task was used for all of the following Box model tasks.

#### Options for 2Box variables $t_1$ , $t_2$ , and $t_g$ :

- If a random  $t_1$ ,  $t_2$  or  $t_g > 0$ , apply following rules:
  1. if  $t_g > \text{Duration}$ , let  $t_g = \text{Duration}$
  2. if  $t_2 > \text{Duration}$ , let  $t_2 = \text{Duration}$
  3. if  $t_1 > t_2$ , let  $t_1 = 1/2 t_2$

#### Options for 2Box Constant Emission Model variables $t_2$ and $t_g$ :

- $t_g$  is not linked to task Duration (DEFAULT)
- $t_2$  is always equal to task Duration (DEFAULT)

---

## STATISTICS

---

#### Output Units: mg/m<sup>3</sup>

Simulation N: 10000

#### Non-parametric Statistics

Min: 0.064

Max: 0.145

Median: 0.093

Mode: 0.095

X0.05: 0.079

X0.50: 0.093

X0.60: 0.096

X0.70: 0.099

X0.75: 0.100

X0.80: 0.102

X0.90: 0.107

X0.95: 0.111

X0.99: 0.120

X0.999: 0.131

## Normal Distribution Statistics

Mean: 0.094

SD: 0.010

## Lognormal Distribution Statistics

GM: 0.093

GSD: 1.111

X0.95: 0.111

X0.99: 0.119

## GRAPHS

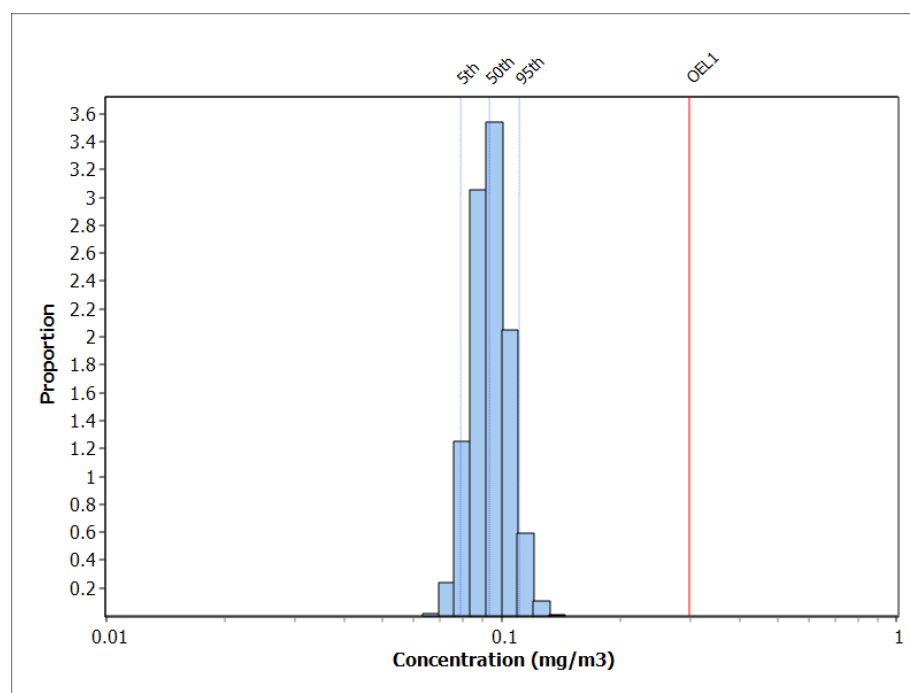

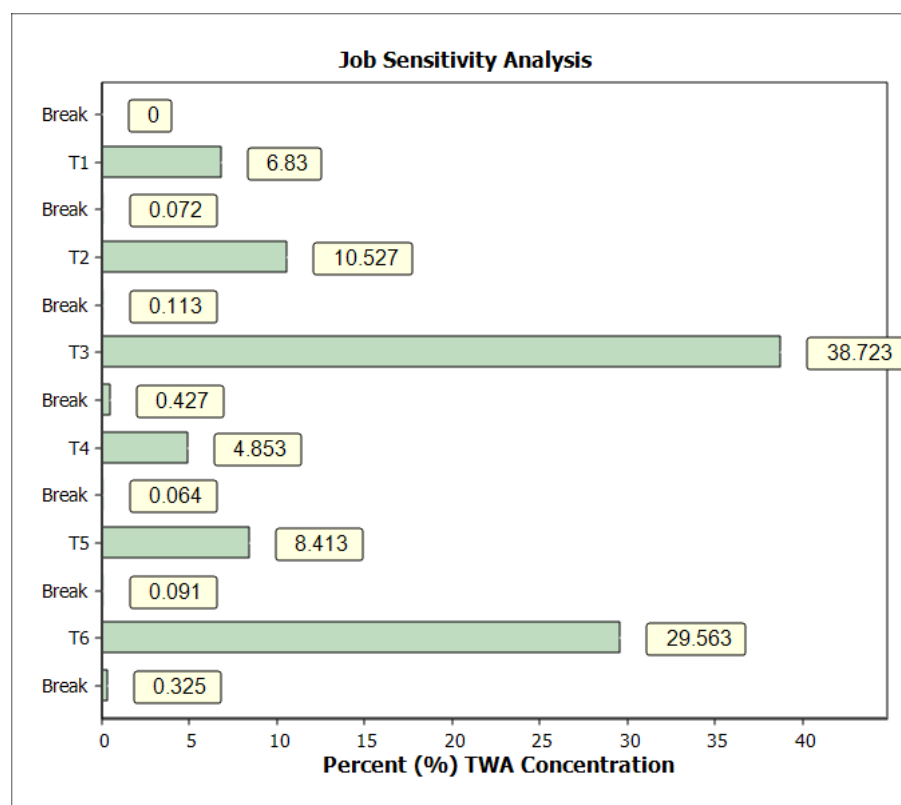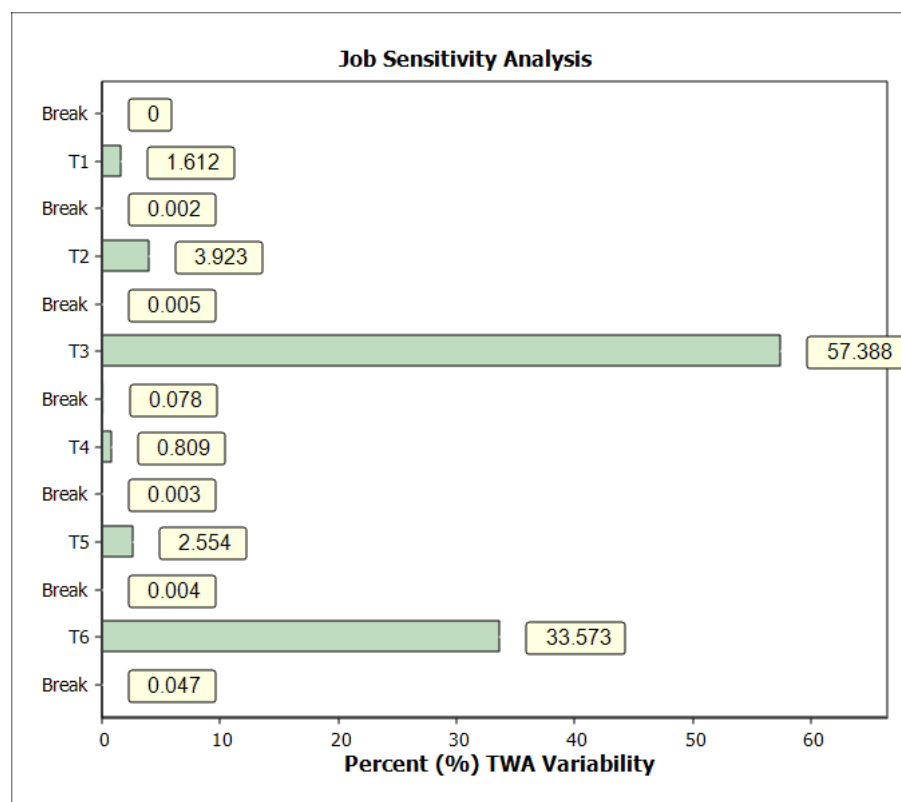

---

**TEXT S4: TiO<sub>2</sub> Far-Field**

---

Version: TEAS 2019 (Version 1.0)

Date: 6/24/2021 3:20:14 PM

---

---

**SUBSTANCE INFORMATION**

---

TiO<sub>2</sub>-N particles dispersed in EtOH (1% w/w). TiO<sub>2</sub> content of aerosol particles at NF was 44% according to the ICP-MS analysis of collected particles.

---

---

**EXPOSURE LIMITS**

---

---

| Limit value                | Type | Source    | Notes                                                                                |
|----------------------------|------|-----------|--------------------------------------------------------------------------------------|
| REL: 0.3 mg/m <sup>3</sup> | TWA  | NIOSH REL | Here concentrations are for total dust (44% is TiO <sub>2</sub> from the total dust) |

---

---

**EXPOSURE LIMITS**

---

---

|                             | Type | Source    | Notes |
|-----------------------------|------|-----------|-------|
| OEL1: 0.3 ug/m <sup>3</sup> | TWA  | NIOSH REL |       |

---

---

**TASK INFORMATION**

---

TASK 1 - T1

Description:

Model: M201

Model Name: 2Box.CE.Gv

| Variable     | Variable Model               | Units               |
|--------------|------------------------------|---------------------|
| 1: Frequency | ~ ConstantInt (4, , )        | /shift              |
| 2: Duration  | ~ UniformInt (7, 9, )        | min                 |
| 3: G         | ~ Constant (1.3, , )         | mg/min              |
| 4: Q         | ~ Uniform (2.5, 10, )        | ACH                 |
| 5: V         | ~ Uniform (1200, 1470, )     | m <sup>3</sup>      |
| 6: Vn        | ~ Triangular (3, 1, 8 )      | m <sup>3</sup>      |
| 7: β         | ~ Lognormal (5.588, 1.477, ) | m <sup>3</sup> /min |
| 8: tg        | ~ Constant (2, , )           | min                 |
| 9: t1        | ~ Constant (0, , )           | min                 |
| 10: t2       | ~ Constant (0, , )           | min                 |

## TASK 2 - Break

Description:

Model: M201

Model Name: 2Box.CE.Gv

| Variable     | Variable Model               | Units               |
|--------------|------------------------------|---------------------|
| 1: Frequency | ~ ConstantInt (1, , )        | /shift              |
| 2: Duration  | ~ UniformInt (18, 19, )      | min                 |
| 3: G         | ~ Constant (0, , )           | mg/min              |
| 4: Q         | ~ Uniform (2.5, 10, )        | ACH                 |
| 5: V         | ~ Uniform (1200, 1470, )     | m <sup>3</sup>      |
| 6: Vn        | ~ Triangular (3, 1, 8 )      | m <sup>3</sup>      |
| 7: β         | ~ Lognormal (5.588, 1.477, ) | m <sup>3</sup> /min |
| 8: tg        | ~ Constant (0, , )           | min                 |
| 9: t1        | ~ Constant (0, , )           | min                 |
| 10: t2       | ~ Constant (0, , )           | min                 |

## TASK 3 - T2

Description:

Model: M201

Model Name: 2Box.CE.Gv

| Variable     | Variable Model               | Units               |
|--------------|------------------------------|---------------------|
| 1: Frequency | ~ ConstantInt (4, , )        | /shift              |
| 2: Duration  | ~ UniformInt (7, 9, )        | min                 |
| 3: G         | ~ Constant (2, , )           | mg/min              |
| 4: Q         | ~ Uniform (2.5, 10, )        | ACH                 |
| 5: V         | ~ Uniform (1200, 1470, )     | m <sup>3</sup>      |
| 6: Vn        | ~ Triangular (3, 1, 8 )      | m <sup>3</sup>      |
| 7: β         | ~ Lognormal (5.588, 1.477, ) | m <sup>3</sup> /min |
| 8: tg        | ~ Constant (2, , )           | min                 |
| 9: t1        | ~ Constant (0, , )           | min                 |
| 10: t2       | ~ Constant (0, , )           | min                 |

## TASK 4 - Break



Description:

Model: M201

Model Name: 2Box.CE.Gv

| Variable     | Variable Model               | Units               |
|--------------|------------------------------|---------------------|
| 1: Frequency | ~ ConstantInt (1, , )        | /shift              |
| 2: Duration  | ~ UniformInt (18, 19, )      | min                 |
| 3: G         | ~ Constant (0, , )           | mg/min              |
| 4: Q         | ~ Uniform (2.5, 10, )        | ACH                 |
| 5: V         | ~ Uniform (1200, 1470, )     | m <sup>3</sup>      |
| 6: Vn        | ~ Triangular (3, 1, 8)       | m <sup>3</sup>      |
| 7: β         | ~ Lognormal (5.588, 1.477, ) | m <sup>3</sup> /min |
| 8: tg        | ~ Constant (0, , )           | min                 |
| 9: t1        | ~ Constant (0, , )           | min                 |
| 10: t2       | ~ Constant (0, , )           | min                 |

TASK 5 - T3

Description:

Model: M201

Model Name: 2Box.CE.Gv

| Variable     | Variable Model               | Units               |
|--------------|------------------------------|---------------------|
| 1: Frequency | ~ ConstantInt (4, , )        | /shift              |
| 2: Duration  | ~ UniformInt (7, 9, )        | min                 |
| 3: G         | ~ Constant (5.9, , )         | mg/min              |
| 4: Q         | ~ Uniform (2.5, 10, )        | ACH                 |
| 5: V         | ~ Uniform (1200, 1470, )     | m <sup>3</sup>      |
| 6: Vn        | ~ Triangular (3, 1, 8)       | m <sup>3</sup>      |
| 7: β         | ~ Lognormal (5.588, 1.477, ) | m <sup>3</sup> /min |
| 8: tg        | ~ Uniform (2, 3, )           | min                 |
| 9: t1        | ~ Constant (0, , )           | min                 |
| 10: t2       | ~ Constant (0, , )           | min                 |

TASK 6 - Break

Description:

Model: M201

Model Name: 2Box.CE.Gv

| Variable     | Variable Model               | Units               |
|--------------|------------------------------|---------------------|
| 1: Frequency | ~ ConstantInt (1, , )        | /shift              |
| 2: Duration  | ~ UniformInt (18, 19, )      | min                 |
| 3: G         | ~ Constant (0, , )           | mg/min              |
| 4: Q         | ~ Uniform (2.5, 10, )        | ACH                 |
| 5: V         | ~ Uniform (1200, 1470, )     | m <sup>3</sup>      |
| 6: Vn        | ~ Triangular (3, 1, 8)       | m <sup>3</sup>      |
| 7: β         | ~ Lognormal (5.588, 1.477, ) | m <sup>3</sup> /min |

|        |                    |     |
|--------|--------------------|-----|
| 8: tg  | ~ Constant (0, , ) | min |
| 9: t1  | ~ Constant (0, , ) | min |
| 10: t2 | ~ Constant (0, , ) | min |

## TASK 7 - T4

Description:

Model: M201

Model Name: 2Box.CE.Gv

| Variable     | Variable Model               | Units               |
|--------------|------------------------------|---------------------|
| 1: Frequency | ~ ConstantInt (4, , )        | /shift              |
| 2: Duration  | ~ UniformInt (7, 9, )        | min                 |
| 3: G         | ~ Constant (0.9, , )         | mg/min              |
| 4: Q         | ~ Uniform (2.5, 10, )        | ACH                 |
| 5: V         | ~ Uniform (1200, 1470, )     | m <sup>3</sup>      |
| 6: Vn        | ~ Triangular (3, 1, 8 )      | m <sup>3</sup>      |
| 7: β         | ~ Lognormal (5.588, 1.477, ) | m <sup>3</sup> /min |
| 8: tg        | ~ Constant (2, , )           | min                 |
| 9: t1        | ~ Constant (0, , )           | min                 |
| 10: t2       | ~ Constant (0, , )           | min                 |

## TASK 8 - Break

Description:

Model: M201

Model Name: 2Box.CE.Gv

| Variable     | Variable Model               | Units               |
|--------------|------------------------------|---------------------|
| 1: Frequency | ~ ConstantInt (1, , )        | /shift              |
| 2: Duration  | ~ UniformInt (18, 19, )      | min                 |
| 3: G         | ~ Constant (0, , )           | mg/min              |
| 4: Q         | ~ Uniform (2.5, 10, )        | ACH                 |
| 5: V         | ~ Uniform (1200, 1470, )     | m <sup>3</sup>      |
| 6: Vn        | ~ Triangular (3, 1, 8 )      | m <sup>3</sup>      |
| 7: β         | ~ Lognormal (5.588, 1.477, ) | m <sup>3</sup> /min |
| 8: tg        | ~ Constant (0, , )           | min                 |
| 9: t1        | ~ Constant (0, , )           | min                 |
| 10: t2       | ~ Constant (0, , )           | min                 |

## TASK 9 - T5

Description:

Model: M201

Model Name: 2Box.CE.Gv

| Variable     | Variable Model        | Units  |
|--------------|-----------------------|--------|
| 1: Frequency | ~ ConstantInt (4, , ) | /shift |
| 2: Duration  | ~ UniformInt (7, 9, ) | min    |

|        |                              |                     |
|--------|------------------------------|---------------------|
| 3: G   | ~ Constant (1.6, , )         | mg/min              |
| 4: Q   | ~ Uniform (2.5, 10, )        | ACH                 |
| 5: V   | ~ Uniform (1200, 1470, )     | m <sup>3</sup>      |
| 6: Vn  | ~ Triangular (3, 1, 8 )      | m <sup>3</sup>      |
| 7: β   | ~ Lognormal (5.588, 1.477, ) | m <sup>3</sup> /min |
| 8: tg  | ~ Constant (2, , )           | min                 |
| 9: t1  | ~ Constant (0, , )           | min                 |
| 10: t2 | ~ Constant (0, , )           | min                 |

## TASK 10 - Break

Description:

Model: M201

Model Name: 2Box.CE.Gv

| Variable     | Variable Model               | Units               |
|--------------|------------------------------|---------------------|
| 1: Frequency | ~ ConstantInt (1, , )        | /shift              |
| 2: Duration  | ~ UniformInt (18, 19, )      | min                 |
| 3: G         | ~ Constant (0, , )           | mg/min              |
| 4: Q         | ~ Uniform (2.5, 10, )        | ACH                 |
| 5: V         | ~ Uniform (1200, 1470, )     | m <sup>3</sup>      |
| 6: Vn        | ~ Triangular (3, 1, 8 )      | m <sup>3</sup>      |
| 7: β         | ~ Lognormal (5.588, 1.477, ) | m <sup>3</sup> /min |
| 8: tg        | ~ Constant (0, , )           | min                 |
| 9: t1        | ~ Constant (0, , )           | min                 |
| 10: t2       | ~ Constant (0, , )           | min                 |

## TASK 11 - T6

Description:

Model: M201

Model Name: 2Box.CE.Gv

| Variable     | Variable Model               | Units               |
|--------------|------------------------------|---------------------|
| 1: Frequency | ~ ConstantInt (4, , )        | /shift              |
| 2: Duration  | ~ UniformInt (7, 9, )        | min                 |
| 3: G         | ~ Constant (4.5, , )         | mg/min              |
| 4: Q         | ~ Uniform (2.5, 10, )        | ACH                 |
| 5: V         | ~ Uniform (1200, 1470, )     | m <sup>3</sup>      |
| 6: Vn        | ~ Triangular (3, 1, 8 )      | m <sup>3</sup>      |
| 7: β         | ~ Lognormal (5.588, 1.477, ) | m <sup>3</sup> /min |
| 8: tg        | ~ Uniform (2, 3, )           | min                 |
| 9: t1        | ~ Constant (0, , )           | min                 |
| 10: t2       | ~ Constant (0, , )           | min                 |

## TASK 12 - Break

Description:

Model: M201

Model Name: 2Box.CE.Gv

| Variable     | Variable Model               | Units               |
|--------------|------------------------------|---------------------|
| 1: Frequency | ~ ConstantInt (1, , )        | /shift              |
| 2: Duration  | ~ UniformInt (18, 19, )      | min                 |
| 3: G         | ~ Constant (0, , )           | mg/min              |
| 4: Q         | ~ Uniform (2.5, 10, )        | ACH                 |
| 5: V         | ~ Uniform (1200, 1470, )     | m <sup>3</sup>      |
| 6: Vn        | ~ Triangular (3, 1, 8 )      | m <sup>3</sup>      |
| 7: ß         | ~ Lognormal (5.588, 1.477, ) | m <sup>3</sup> /min |
| 8: tg        | ~ Constant (0, , )           | min                 |
| 9: t1        | ~ Constant (0, , )           | min                 |
| 10: t2       | ~ Constant (0, , )           | min                 |

#### TWA CALCULATION (TASK OR FULL SHIFT)

Task TWA - the TWA is calculated for the duration of the task(s).

#### SIMULATION OPTIONS

Unless noted below, for all variables modeled with a statistical distribution a random value was generated for each repeat of a task.

##### Room Variables:

- For each TWA, the room ventilation rate Q generated for the first Box model task was used for all of the following Box model tasks.
- For each TWA, the room volume V generated for the first Box model task was used for all of the following Box model tasks.

##### Options for 2Box variables t1, t2, and tg:

- If a random t1, t2 or tg > 0, apply following rules:
  1. if tg > Duration, let tg = Duration
  2. if t2 > Duration, let t2 = Duration
  3. if t1 > t2, let t1=1/2 t2

Options for 2Box Constant Emission Model variables t2 and tg:

- tg is not linked to task Duration (DEFAULT)
- t2 is always equal to task Duration (DEFAULT)

---

## STATISTICS

---

Output Units: mg/m3

Simulation N: 10000

### Non-parametric Statistics

Min: 0.002

Max: 0.010

Median: 0.004

Mode: 0.003

X0.05: 0.002

X0.50: 0.004

X0.60: 0.004

X0.70: 0.005

X0.75: 0.005

X0.80: 0.005

X0.90: 0.007

X0.95: 0.007

X0.99: 0.008

X0.999: 0.009

### Normal Distribution Statistics

Mean: 0.004

SD: 0.002

### Lognormal Distribution Statistics

GM: 0.004

GSD: 1.452

X0.95: 0.007

X0.99: 0.009

GRAPHS

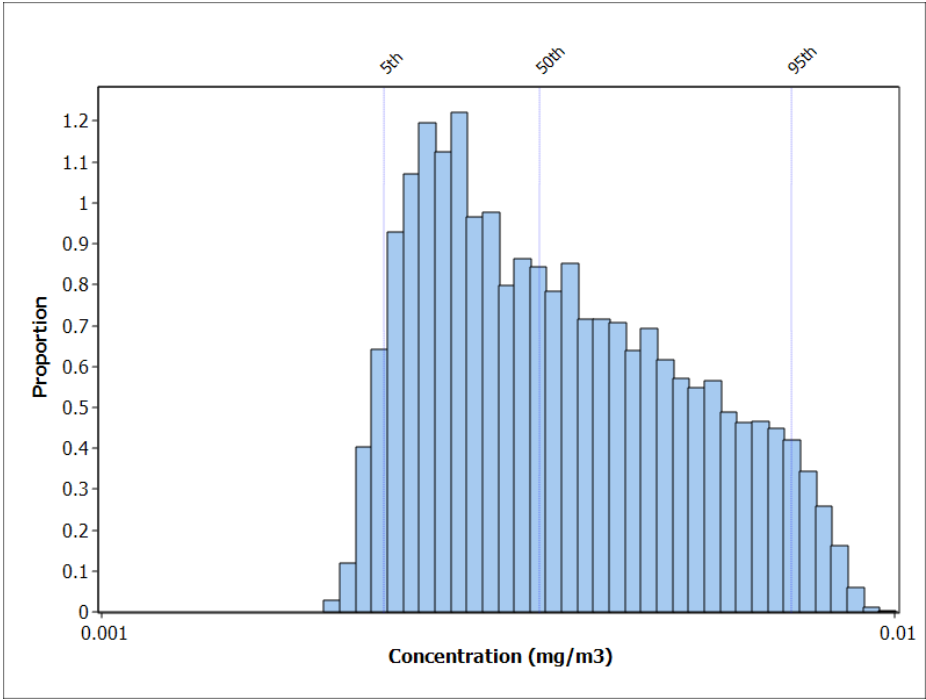

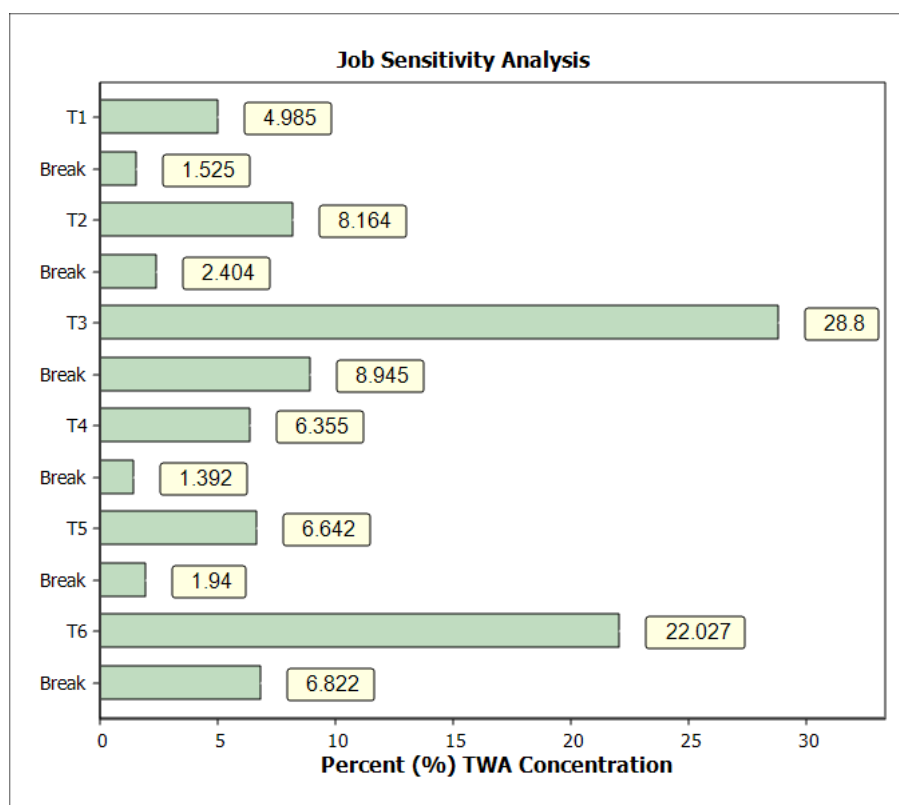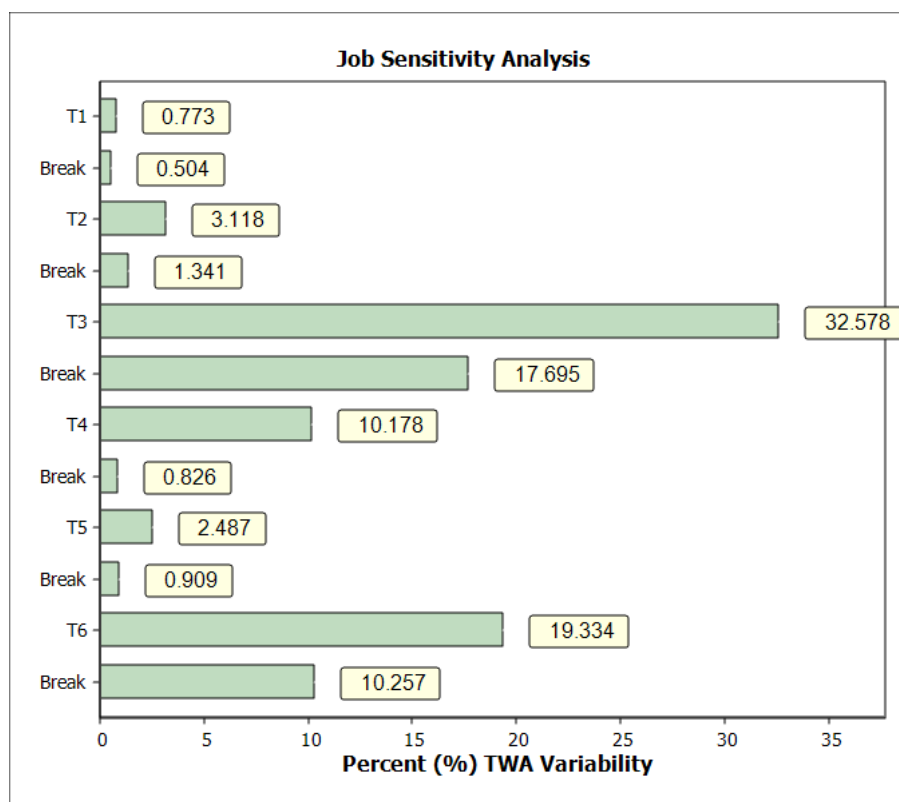

**TEXT S5: Ag-HEC Near-Field**

Version: TEAS 2019 (Version 1.0)

Date: 6/24/2021 3:26:46 PM

**SUBSTANCE INFORMATION**

Ag-HEC particles dispersed in water. Ag content of aerosol particles at NF was 1.1% according to the ICP-MS analysis of collected particles.

**EXPOSURE LIMITS**

| Limit value    | Type | Source    | Notes                                                                   |
|----------------|------|-----------|-------------------------------------------------------------------------|
| REL: 0.9 ug/m3 | TWA  | NIOSH REL | Here concentrations are for total dust (1.1% is Ag from the total dust) |

**TASK INFORMATION**

TASK 1 - T7

Description:

Model: M201

Model Name: 2Box.CE.Gv

| Variable     | Variable Model               | Units               |
|--------------|------------------------------|---------------------|
| 1: Frequency | ~ ConstantInt (4, , )        | /shift              |
| 2: Duration  | ~ ConstantInt (11, , )       | min                 |
| 3: G         | ~ Constant (0, , )           | mg/min              |
| 4: Q         | ~ Uniform (2.5, 10, )        | ACH                 |
| 5: V         | ~ Uniform (1200, 1470, )     | m <sup>3</sup>      |
| 6: Vn        | ~ Triangular (3, 1, 8 )      | m <sup>3</sup>      |
| 7: β         | ~ Lognormal (5.588, 1.477, ) | m <sup>3</sup> /min |
| 8: tg        | ~ Constant (0, , )           | min                 |
| 9: t1        | ~ Constant (0, , )           | min                 |
| 10: t2       | ~ Constant (11, , )          | min                 |



## TASK 2 - Break

Description:

Model: M201

Model Name: 2Box.CE.Gv

| Variable     | Variable Model               | Units               |
|--------------|------------------------------|---------------------|
| 1: Frequency | ~ ConstantInt (1, , )        | /shift              |
| 2: Duration  | ~ ConstantInt (19, , )       | min                 |
| 3: G         | ~ Constant (0, , )           | mg/min              |
| 4: Q         | ~ Uniform (2.5, 10, )        | ACH                 |
| 5: V         | ~ Uniform (1200, 1470, )     | m <sup>3</sup>      |
| 6: Vn        | ~ Triangular (3, 1, 8 )      | m <sup>3</sup>      |
| 7: β         | ~ Lognormal (5.588, 1.477, ) | m <sup>3</sup> /min |
| 8: tg        | ~ Constant (0, , )           | min                 |
| 9: t1        | ~ Constant (0, , )           | min                 |
| 10: t2       | ~ Constant (19, , )          | min                 |

## TASK 3 - T8

Description:

Model: M201

Model Name: 2Box.CE.Gv

| Variable     | Variable Model               | Units               |
|--------------|------------------------------|---------------------|
| 1: Frequency | ~ ConstantInt (4, , )        | /shift              |
| 2: Duration  | ~ UniformInt (7, 9, )        | min                 |
| 3: G         | ~ Constant (0.8, , )         | mg/min              |
| 4: Q         | ~ Uniform (2.5, 10, )        | ACH                 |
| 5: V         | ~ Uniform (1200, 1470, )     | m <sup>3</sup>      |
| 6: Vn        | ~ Triangular (3, 1, 8 )      | m <sup>3</sup>      |
| 7: β         | ~ Lognormal (5.588, 1.477, ) | m <sup>3</sup> /min |
| 8: tg        | ~ Uniform (1, 2, )           | min                 |
| 9: t1        | ~ Constant (0, , )           | min                 |
| 10: t2       | ~ Constant (9, , )           | min                 |

## TASK 4 - Break

Description:

Model: M201

Model Name: 2Box.CE.Gv

| Variable     | Variable Model           | Units          |
|--------------|--------------------------|----------------|
| 1: Frequency | ~ ConstantInt (1, , )    | /shift         |
| 2: Duration  | ~ ConstantInt (19, , )   | min            |
| 3: G         | ~ Constant (0, , )       | mg/min         |
| 4: Q         | ~ Uniform (2.5, 10, )    | ACH            |
| 5: V         | ~ Uniform (1200, 1470, ) | m <sup>3</sup> |
| 6: Vn        | ~ Triangular (3, 1, 8 )  | m <sup>3</sup> |

|            |                              |                     |
|------------|------------------------------|---------------------|
| 7: $\beta$ | ~ Lognormal (5.588, 1.477, ) | m <sup>3</sup> /min |
| 8: tg      | ~ Constant (0, , )           | min                 |
| 9: t1      | ~ Constant (0, , )           | min                 |
| 10: t2     | ~ Constant (19, , )          | min                 |

## TASK 5 - T9

Description:

Model: M201

Model Name: 2Box.CE.Gv

| Variable     | Variable Model               | Units               |
|--------------|------------------------------|---------------------|
| 1: Frequency | ~ ConstantInt (4, , )        | /shift              |
| 2: Duration  | ~ UniformInt (7, 9, )        | min                 |
| 3: G         | ~ Constant (1.3, , )         | mg/min              |
| 4: Q         | ~ Uniform (2.5, 10, )        | ACH                 |
| 5: V         | ~ Uniform (1200, 1470, )     | m <sup>3</sup>      |
| 6: Vn        | ~ Triangular (3, 1, 8 )      | m <sup>3</sup>      |
| 7: $\beta$   | ~ Lognormal (5.588, 1.477, ) | m <sup>3</sup> /min |
| 8: tg        | ~ Uniform (1, 2, )           | min                 |
| 9: t1        | ~ Constant (0, , )           | min                 |
| 10: t2       | ~ Constant (9, , )           | min                 |

## TASK 6 - Break

Description:

Model: M201

Model Name: 2Box.CE.Gv

| Variable     | Variable Model               | Units               |
|--------------|------------------------------|---------------------|
| 1: Frequency | ~ ConstantInt (1, , )        | /shift              |
| 2: Duration  | ~ ConstantInt (19, , )       | min                 |
| 3: G         | ~ Constant (0, , )           | mg/min              |
| 4: Q         | ~ Uniform (2.5, 10, )        | ACH                 |
| 5: V         | ~ Uniform (1200, 1470, )     | m <sup>3</sup>      |
| 6: Vn        | ~ Triangular (3, 1, 8 )      | m <sup>3</sup>      |
| 7: $\beta$   | ~ Lognormal (5.588, 1.477, ) | m <sup>3</sup> /min |
| 8: tg        | ~ Constant (0, , )           | min                 |
| 9: t1        | ~ Constant (0, , )           | min                 |
| 10: t2       | ~ Constant (19, , )          | min                 |

## TASK 7 - T10

Description:

Model: M201

Model Name: 2Box.CE.Gv

| Variable     | Variable Model               | Units               |
|--------------|------------------------------|---------------------|
| 1: Frequency | ~ ConstantInt (4, , )        | /shift              |
| 2: Duration  | ~ UniformInt (7, 9, )        | min                 |
| 3: G         | ~ Constant (1.9, , )         | mg/min              |
| 4: Q         | ~ Uniform (2.5, 10, )        | ACH                 |
| 5: V         | ~ Uniform (1200, 1470, )     | m <sup>3</sup>      |
| 6: Vn        | ~ Triangular (3, 1, 8 )      | m <sup>3</sup>      |
| 7: β         | ~ Lognormal (5.588, 1.477, ) | m <sup>3</sup> /min |
| 8: tg        | ~ Constant (2, , )           | min                 |
| 9: t1        | ~ Constant (0, , )           | min                 |
| 10: t2       | ~ Constant (19, , )          | min                 |

## TASK 8 - Break

Description:

Model: M201

Model Name: 2Box.CE.Gv

| Variable     | Variable Model               | Units               |
|--------------|------------------------------|---------------------|
| 1: Frequency | ~ ConstantInt (1, , )        | /shift              |
| 2: Duration  | ~ ConstantInt (19, , )       | min                 |
| 3: G         | ~ Constant (0, , )           | mg/min              |
| 4: Q         | ~ Uniform (2.5, 10, )        | ACH                 |
| 5: V         | ~ Uniform (1200, 1470, )     | m <sup>3</sup>      |
| 6: Vn        | ~ Triangular (3, 1, 8 )      | m <sup>3</sup>      |
| 7: β         | ~ Lognormal (5.588, 1.477, ) | m <sup>3</sup> /min |
| 8: tg        | ~ Constant (0, , )           | min                 |
| 9: t1        | ~ Constant (0, , )           | min                 |
| 10: t2       | ~ Constant (19, , )          | min                 |

## TASK 9 - T11

Description:

Model: M201

Model Name: 2Box.CE.Gv

| Variable     | Variable Model               | Units               |
|--------------|------------------------------|---------------------|
| 1: Frequency | ~ ConstantInt (4, , )        | /shift              |
| 2: Duration  | ~ UniformInt (7, 9, )        | min                 |
| 3: G         | ~ Constant (2.2, , )         | mg/min              |
| 4: Q         | ~ Uniform (2.5, 10, )        | ACH                 |
| 5: V         | ~ Uniform (1200, 1470, )     | m <sup>3</sup>      |
| 6: Vn        | ~ Triangular (3, 1, 8 )      | m <sup>3</sup>      |
| 7: β         | ~ Lognormal (5.588, 1.477, ) | m <sup>3</sup> /min |
| 8: tg        | ~ Uniform (1, 2, )           | min                 |
| 9: t1        | ~ Constant (0, , )           | min                 |
| 10: t2       | ~ Constant (9, , )           | min                 |

## TASK 10 - Break

Description:

Model: M201

Model Name: 2Box.CE.Gv

| Variable     | Variable Model               | Units               |
|--------------|------------------------------|---------------------|
| 1: Frequency | ~ ConstantInt (1, , )        | /shift              |
| 2: Duration  | ~ ConstantInt (19, , )       | min                 |
| 3: G         | ~ Constant (0, , )           | mg/min              |
| 4: Q         | ~ Uniform (2.5, 10, )        | ACH                 |
| 5: V         | ~ Uniform (1200, 1470, )     | m <sup>3</sup>      |
| 6: Vn        | ~ Triangular (3, 1, 8 )      | m <sup>3</sup>      |
| 7: β         | ~ Lognormal (5.588, 1.477, ) | m <sup>3</sup> /min |
| 8: tg        | ~ Constant (0, , )           | min                 |
| 9: t1        | ~ Constant (0, , )           | min                 |
| 10: t2       | ~ Constant (19, , )          | min                 |

## TASK 11 - T12

Description:

Model: M201

Model Name: 2Box.CE.Gv

| Variable     | Variable Model               | Units               |
|--------------|------------------------------|---------------------|
| 1: Frequency | ~ ConstantInt (4, , )        | /shift              |
| 2: Duration  | ~ UniformInt (7, 9, )        | min                 |
| 3: G         | ~ Constant (2.6, , )         | mg/min              |
| 4: Q         | ~ Uniform (2.5, 10, )        | ACH                 |
| 5: V         | ~ Uniform (1200, 1470, )     | m <sup>3</sup>      |
| 6: Vn        | ~ Triangular (3, 1, 8 )      | m <sup>3</sup>      |
| 7: β         | ~ Lognormal (5.588, 1.477, ) | m <sup>3</sup> /min |
| 8: tg        | ~ Constant (2, , )           | min                 |
| 9: t1        | ~ Constant (0, , )           | min                 |
| 10: t2       | ~ Constant (19, , )          | min                 |

## TASK 12 - Break

Description:

Model: M201

Model Name: 2Box.CE.Gv

| Variable     | Variable Model           | Units          |
|--------------|--------------------------|----------------|
| 1: Frequency | ~ ConstantInt (1, , )    | /shift         |
| 2: Duration  | ~ ConstantInt (19, , )   | min            |
| 3: G         | ~ Constant (0, , )       | mg/min         |
| 4: Q         | ~ Uniform (2.5, 10, )    | ACH            |
| 5: V         | ~ Uniform (1200, 1470, ) | m <sup>3</sup> |
| 6: Vn        | ~ Triangular (3, 1, 8 )  | m <sup>3</sup> |

---

|            |                                              |                         |
|------------|----------------------------------------------|-------------------------|
| 7: $\beta$ | $\sim \text{Lognormal}(5.588, 1.477, \quad)$ | $\text{m}^3/\text{min}$ |
| 8: $t_g$   | $\sim \text{Constant}(0, \quad)$             | min                     |
| 9: $t_1$   | $\sim \text{Constant}(0, \quad)$             | min                     |
| 10: $t_2$  | $\sim \text{Constant}(19, \quad)$            | min                     |

---



---

#### TWA CALCULATION (TASK OR FULL SHIFT)

---

Task TWA - the TWA is calculated for the duration of the task(s).

---

## SIMULATION OPTIONS

---

Unless noted below, for all variables modeled with a statistical distribution a random value was generated for each repeat of a task.

### Room Variables:

- For each TWA, the room ventilation rate  $Q$  generated for the first Box model task was used for all of the following Box model tasks.
- For each TWA, the room volume  $V$  generated for the first Box model task was used for all of the following Box model tasks.

### Options for 2Box variables $t_1$ , $t_2$ , and $t_g$ :

- If a random  $t_1$ ,  $t_2$  or  $t_g > 0$ , apply following rules:
  1. if  $t_g > \text{Duration}$ , let  $t_g = \text{Duration}$
  2. if  $t_2 > \text{Duration}$ , let  $t_2 = \text{Duration}$
  3. if  $t_1 > t_2$ , let  $t_1 = 1/2 t_2$

### Options for 2Box Constant Emission Model variables $t_2$ and $t_g$ :

- $t_g$  is not linked to task Duration (DEFAULT)
- $t_2$  is always equal to task Duration (DEFAULT)

---

## STATISTICS

---

Output Units: mg/m<sup>3</sup>

Simulation N: 10000

### Non-parametric Statistics

Min: 0.027

Max: 0.060

Median: 0.039

Mode: 0.039

X0.05: 0.033

X0.50: 0.039

X0.60: 0.040

---

|         |       |
|---------|-------|
| X0.70:  | 0.041 |
| X0.75:  | 0.042 |
| X0.80:  | 0.042 |
| X0.90:  | 0.044 |
| X0.95:  | 0.046 |
| X0.99:  | 0.049 |
| X0.999: | 0.053 |

#### Normal Distribution Statistics

|       |       |
|-------|-------|
| Mean: | 0.039 |
| SD:   | 0.004 |

#### Lognormal Distribution Statistics

|      |       |
|------|-------|
| GM:  | 0.039 |
| GSD: | 1.106 |

|        |       |
|--------|-------|
| X0.95: | 0.046 |
| X0.99: | 0.049 |

---

## GRAPHS

---

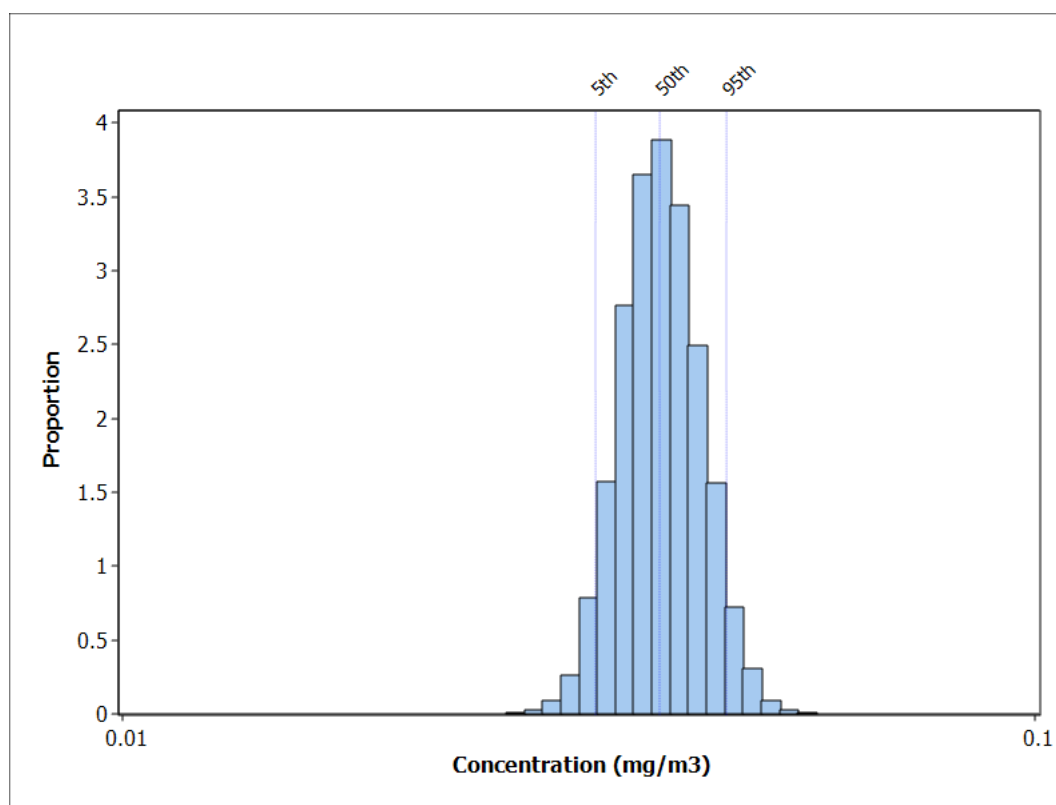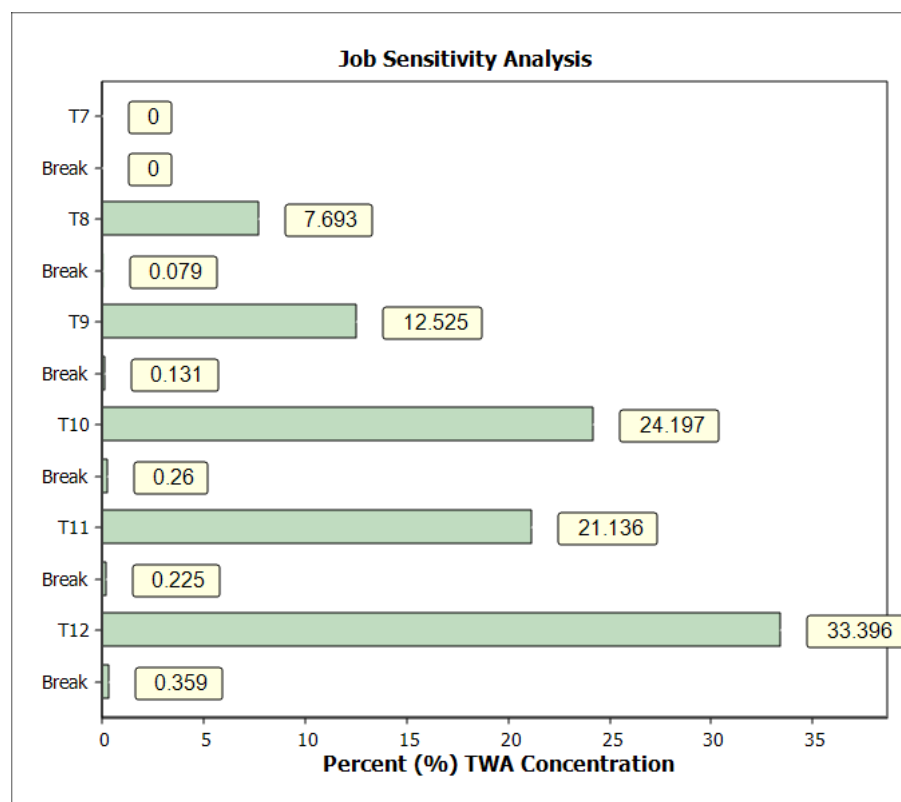



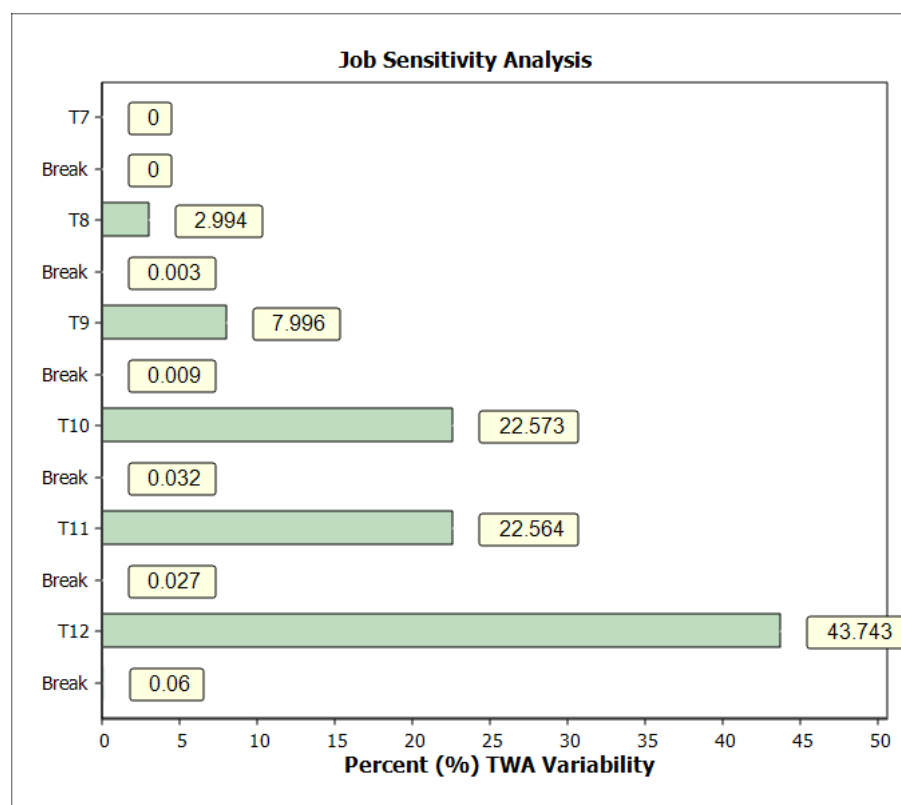

**TEXT S6: Ag-HEC Far-Field**

Version: TEAS 2019 (Version 1.0)

Date: 6/24/2021 3:29:27 PM

**SUBSTANCE INFORMATION**

Ag-HEC particles dispersed in water. Ag content of aerosol particles at NF was 1.1% according to the ICP-MS analysis of collected particles.

**EXPOSURE LIMITS**

| Limit value    | Type | Source    | Notes                                                                   |
|----------------|------|-----------|-------------------------------------------------------------------------|
| REL: 0.9 ug/m3 | TWA  | NIOSH REL | Here concentrations are for total dust (1.1% is Ag from the total dust) |

**TASK INFORMATION**

TASK 1 - T7

Description:

Model: M201

Model Name: 2Box.CE.Gv

| Variable     | Variable Model               | Units               |
|--------------|------------------------------|---------------------|
| 1: Frequency | ~ ConstantInt (4, , )        | /shift              |
| 2: Duration  | ~ ConstantInt (11, , )       | min                 |
| 3: G         | ~ Constant (0, , )           | mg/min              |
| 4: Q         | ~ Uniform (2.5, 10, )        | ACH                 |
| 5: V         | ~ Uniform (1200, 1470, )     | m <sup>3</sup>      |
| 6: Vn        | ~ Triangular (3, 1, 8 )      | m <sup>3</sup>      |
| 7: β         | ~ Lognormal (5.588, 1.477, ) | m <sup>3</sup> /min |
| 8: tg        | ~ Constant (0, , )           | min                 |
| 9: t1        | ~ Constant (0, , )           | min                 |
| 10: t2       | ~ Constant (0, , )           | min                 |

## TASK 2 - Break

Description:

Model: M201

Model Name: 2Box.CE.Gv

| Variable     | Variable Model               | Units               |
|--------------|------------------------------|---------------------|
| 1: Frequency | ~ ConstantInt (1, , )        | /shift              |
| 2: Duration  | ~ ConstantInt (19, , )       | min                 |
| 3: G         | ~ Constant (0, , )           | mg/min              |
| 4: Q         | ~ Uniform (2.5, 10, )        | ACH                 |
| 5: V         | ~ Uniform (1200, 1470, )     | m <sup>3</sup>      |
| 6: Vn        | ~ Triangular (3, 1, 8 )      | m <sup>3</sup>      |
| 7: β         | ~ Lognormal (5.588, 1.477, ) | m <sup>3</sup> /min |
| 8: tg        | ~ Constant (0, , )           | min                 |
| 9: t1        | ~ Constant (0, , )           | min                 |
| 10: t2       | ~ Constant (0, , )           | min                 |

## TASK 3 - T8

Description:

Model: M201

Model Name: 2Box.CE.Gv

| Variable     | Variable Model               | Units               |
|--------------|------------------------------|---------------------|
| 1: Frequency | ~ ConstantInt (4, , )        | /shift              |
| 2: Duration  | ~ UniformInt (7, 9, )        | min                 |
| 3: G         | ~ Constant (0.8, , )         | mg/min              |
| 4: Q         | ~ Uniform (2.5, 10, )        | ACH                 |
| 5: V         | ~ Uniform (1200, 1470, )     | m <sup>3</sup>      |
| 6: Vn        | ~ Triangular (3, 1, 8 )      | m <sup>3</sup>      |
| 7: β         | ~ Lognormal (5.588, 1.477, ) | m <sup>3</sup> /min |
| 8: tg        | ~ Uniform (1, 2, )           | min                 |
| 9: t1        | ~ Constant (0, , )           | min                 |
| 10: t2       | ~ Constant (0, , )           | min                 |

## TASK 4 - Break

Description:

Model: M201

Model Name: 2Box.CE.Gv

| Variable     | Variable Model           | Units          |
|--------------|--------------------------|----------------|
| 1: Frequency | ~ ConstantInt (1, , )    | /shift         |
| 2: Duration  | ~ ConstantInt (19, , )   | min            |
| 3: G         | ~ Constant (0, , )       | mg/min         |
| 4: Q         | ~ Uniform (2.5, 10, )    | ACH            |
| 5: V         | ~ Uniform (1200, 1470, ) | m <sup>3</sup> |
| 6: Vn        | ~ Triangular (3, 1, 8 )  | m <sup>3</sup> |

|            |                              |                     |
|------------|------------------------------|---------------------|
| 7: $\beta$ | ~ Lognormal (5.588, 1.477, ) | m <sup>3</sup> /min |
| 8: tg      | ~ Constant (0, , )           | min                 |
| 9: t1      | ~ Constant (0, , )           | min                 |
| 10: t2     | ~ Constant (0, , )           | min                 |

## TASK 5 - T9

Description:

Model: M201

Model Name: 2Box.CE.Gv

| Variable     | Variable Model               | Units               |
|--------------|------------------------------|---------------------|
| 1: Frequency | ~ ConstantInt (4, , )        | /shift              |
| 2: Duration  | ~ UniformInt (7, 9, )        | min                 |
| 3: G         | ~ Constant (1.3, , )         | mg/min              |
| 4: Q         | ~ Uniform (2.5, 10, )        | ACH                 |
| 5: V         | ~ Uniform (1200, 1470, )     | m <sup>3</sup>      |
| 6: Vn        | ~ Triangular (3, 1, 8 )      | m <sup>3</sup>      |
| 7: $\beta$   | ~ Lognormal (5.588, 1.477, ) | m <sup>3</sup> /min |
| 8: tg        | ~ Uniform (1, 2, )           | min                 |
| 9: t1        | ~ Constant (0, , )           | min                 |
| 10: t2       | ~ Constant (0, , )           | min                 |

## TASK 6 - Break

Description:

Model: M201

Model Name: 2Box.CE.Gv

| Variable     | Variable Model               | Units               |
|--------------|------------------------------|---------------------|
| 1: Frequency | ~ ConstantInt (1, , )        | /shift              |
| 2: Duration  | ~ ConstantInt (19, , )       | min                 |
| 3: G         | ~ Constant (0, , )           | mg/min              |
| 4: Q         | ~ Uniform (2.5, 10, )        | ACH                 |
| 5: V         | ~ Uniform (1200, 1470, )     | m <sup>3</sup>      |
| 6: Vn        | ~ Triangular (3, 1, 8 )      | m <sup>3</sup>      |
| 7: $\beta$   | ~ Lognormal (5.588, 1.477, ) | m <sup>3</sup> /min |
| 8: tg        | ~ Constant (0, , )           | min                 |
| 9: t1        | ~ Constant (0, , )           | min                 |
| 10: t2       | ~ Constant (0, , )           | min                 |

## TASK 7 - T10

Description:

Model: M201

Model Name: 2Box.CE.Gv

| Variable     | Variable Model               | Units               |
|--------------|------------------------------|---------------------|
| 1: Frequency | ~ ConstantInt (4, , )        | /shift              |
| 2: Duration  | ~ UniformInt (7, 9, )        | min                 |
| 3: G         | ~ Constant (1.9, , )         | mg/min              |
| 4: Q         | ~ Uniform (2.5, 10, )        | ACH                 |
| 5: V         | ~ Uniform (1200, 1470, )     | m <sup>3</sup>      |
| 6: Vn        | ~ Triangular (3, 1, 8 )      | m <sup>3</sup>      |
| 7: β         | ~ Lognormal (5.588, 1.477, ) | m <sup>3</sup> /min |
| 8: tg        | ~ Constant (2, , )           | min                 |
| 9: t1        | ~ Constant (0, , )           | min                 |
| 10: t2       | ~ Constant (0, , )           | min                 |

## TASK 8 - Break

Description:

Model: M201

Model Name: 2Box.CE.Gv

| Variable     | Variable Model               | Units               |
|--------------|------------------------------|---------------------|
| 1: Frequency | ~ ConstantInt (1, , )        | /shift              |
| 2: Duration  | ~ ConstantInt (19, , )       | min                 |
| 3: G         | ~ Constant (0, , )           | mg/min              |
| 4: Q         | ~ Uniform (2.5, 10, )        | ACH                 |
| 5: V         | ~ Uniform (1200, 1470, )     | m <sup>3</sup>      |
| 6: Vn        | ~ Triangular (3, 1, 8 )      | m <sup>3</sup>      |
| 7: β         | ~ Lognormal (5.588, 1.477, ) | m <sup>3</sup> /min |
| 8: tg        | ~ Constant (0, , )           | min                 |
| 9: t1        | ~ Constant (0, , )           | min                 |
| 10: t2       | ~ Constant (0, , )           | min                 |

## TASK 9 - T11

Description:

Model: M201

Model Name: 2Box.CE.Gv

| Variable     | Variable Model               | Units               |
|--------------|------------------------------|---------------------|
| 1: Frequency | ~ ConstantInt (4, , )        | /shift              |
| 2: Duration  | ~ UniformInt (7, 9, )        | min                 |
| 3: G         | ~ Constant (2.2, , )         | mg/min              |
| 4: Q         | ~ Uniform (2.5, 10, )        | ACH                 |
| 5: V         | ~ Uniform (1200, 1470, )     | m <sup>3</sup>      |
| 6: Vn        | ~ Triangular (3, 1, 8 )      | m <sup>3</sup>      |
| 7: β         | ~ Lognormal (5.588, 1.477, ) | m <sup>3</sup> /min |
| 8: tg        | ~ Uniform (1, 2, )           | min                 |
| 9: t1        | ~ Constant (0, , )           | min                 |
| 10: t2       | ~ Constant (0, , )           | min                 |

## TASK 10 - Break

Description:

Model: M201

Model Name: 2Box.CE.Gv

| Variable     | Variable Model               | Units               |
|--------------|------------------------------|---------------------|
| 1: Frequency | ~ ConstantInt (1, , )        | /shift              |
| 2: Duration  | ~ ConstantInt (19, , )       | min                 |
| 3: G         | ~ Constant (0, , )           | mg/min              |
| 4: Q         | ~ Uniform (2.5, 10, )        | ACH                 |
| 5: V         | ~ Uniform (1200, 1470, )     | m <sup>3</sup>      |
| 6: Vn        | ~ Triangular (3, 1, 8 )      | m <sup>3</sup>      |
| 7: β         | ~ Lognormal (5.588, 1.477, ) | m <sup>3</sup> /min |
| 8: tg        | ~ Constant (0, , )           | min                 |
| 9: t1        | ~ Constant (0, , )           | min                 |
| 10: t2       | ~ Constant (0, , )           | min                 |

## TASK 11 - T12

Description:

Model: M201

Model Name: 2Box.CE.Gv

| Variable     | Variable Model               | Units               |
|--------------|------------------------------|---------------------|
| 1: Frequency | ~ ConstantInt (4, , )        | /shift              |
| 2: Duration  | ~ UniformInt (7, 9, )        | min                 |
| 3: G         | ~ Constant (2.6, , )         | mg/min              |
| 4: Q         | ~ Uniform (2.5, 10, )        | ACH                 |
| 5: V         | ~ Uniform (1200, 1470, )     | m <sup>3</sup>      |
| 6: Vn        | ~ Triangular (3, 1, 8 )      | m <sup>3</sup>      |
| 7: β         | ~ Lognormal (5.588, 1.477, ) | m <sup>3</sup> /min |
| 8: tg        | ~ Constant (2, , )           | min                 |
| 9: t1        | ~ Constant (0, , )           | min                 |
| 10: t2       | ~ Constant (0, , )           | min                 |

## TASK 12 - Break

Description:

Model: M201

Model Name: 2Box.CE.Gv

| Variable     | Variable Model           | Units          |
|--------------|--------------------------|----------------|
| 1: Frequency | ~ ConstantInt (1, , )    | /shift         |
| 2: Duration  | ~ ConstantInt (19, , )   | min            |
| 3: G         | ~ Constant (0, , )       | mg/min         |
| 4: Q         | ~ Uniform (2.5, 10, )    | ACH            |
| 5: V         | ~ Uniform (1200, 1470, ) | m <sup>3</sup> |
| 6: Vn        | ~ Triangular (3, 1, 8 )  | m <sup>3</sup> |

---

|            |                                              |                     |
|------------|----------------------------------------------|---------------------|
| 7: $\beta$ | $\sim \text{Lognormal}(5.588, 1.477, \quad)$ | m <sup>3</sup> /min |
| 8: tg      | $\sim \text{Constant}(0, \quad)$             | min                 |
| 9: t1      | $\sim \text{Constant}(0, \quad)$             | min                 |
| 10: t2     | $\sim \text{Constant}(0, \quad)$             | min                 |

---



---

## TWA CALCULATION (TASK OR FULL SHIFT)

---

Task TWA - the TWA is calculated for the duration of the task(s).

---

## SIMULATION OPTIONS

---

Unless noted below, for all variables modeled with a statistical distribution a random value was generated for each repeat of a task.

### Room Variables:

- For each TWA, the room ventilation rate Q generated for the first Box model task was used for all of the following Box model tasks.
- For each TWA, the room volume V generated for the first Box model task was used for all of the following Box model tasks.

### Options for 2Box variables t1, t2, and tg:

- If a random t1, t2 or tg > 0, apply following rules:
  1. if tg > Duration, let tg = Duration
  2. if t2 > Duration, let t2 = Duration
  3. if t1 > t2, let t1 = 1/2 t2

### Options for 2Box Constant Emission Model variables t2 and tg:

- tg is not linked to task Duration (DEFAULT)
  - t2 is always equal to task Duration (DEFAULT)
- 

## STATISTICS

---

Output Units:  $\mu\text{g}/\text{m}^3$   
Simulation N: 10000

#### Non-parametric Statistics

Min: 0.749  
Max: 3.609  
Median: 1.403  
Mode: 0.955

X0.05: 0.891  
X0.50: 1.403  
X0.60: 1.587  
X0.70: 1.825  
X0.75: 1.961  
X0.80: 2.130  
X0.90: 2.563  
X0.95: 2.847  
X0.99: 3.224  
X0.999: 3.480

#### Normal Distribution Statistics

Mean: 1.585  
SD: 0.622

#### Lognormal Distribution Statistics

GM: 1.477  
GSD: 1.447

X0.95: 2.712  
X0.99: 3.487

---

## GRAPHS

---



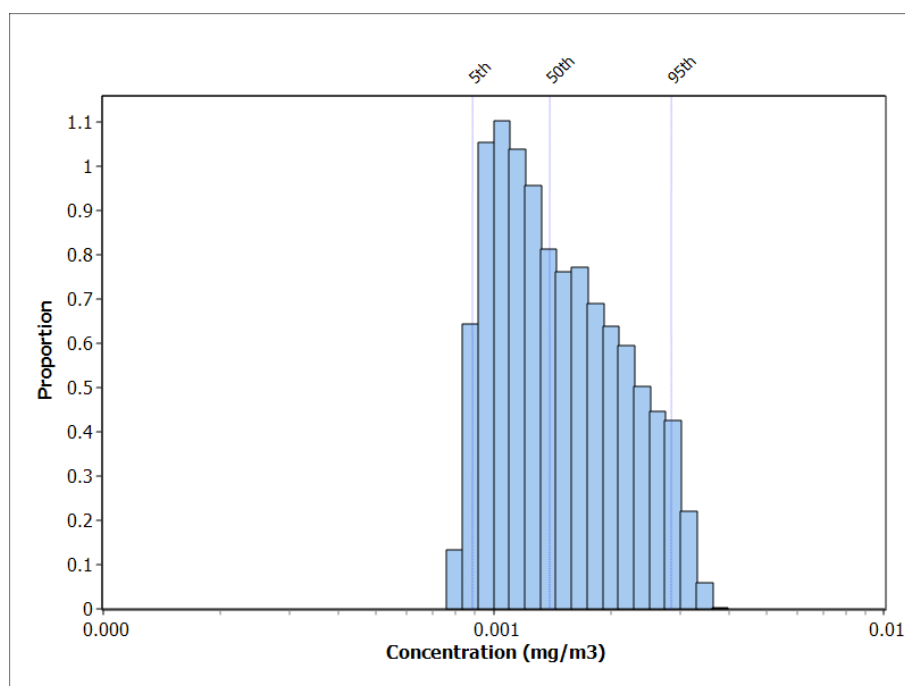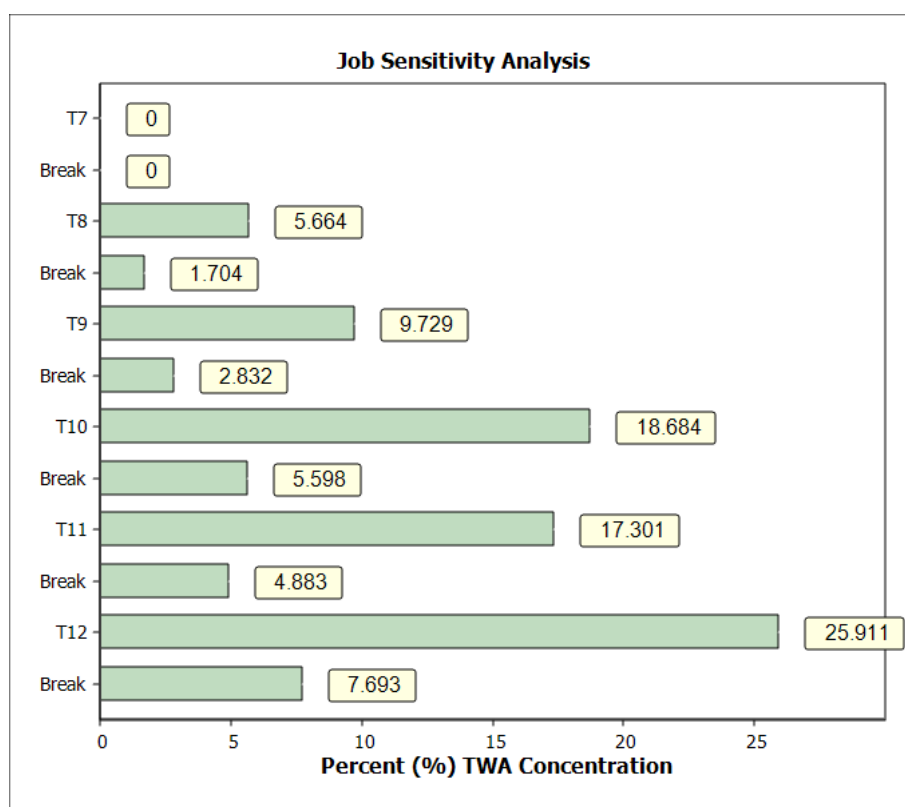

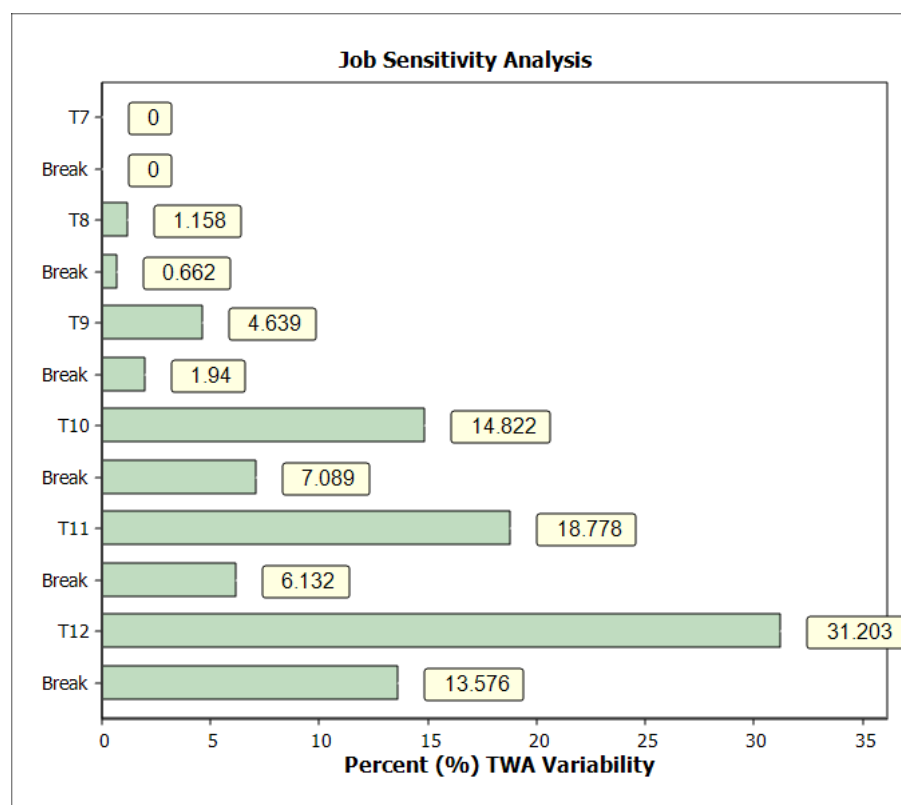

## TEXT S7: Ag-HEC Near-Field RWC

Version: TEAS 2019 (Version 1.0)

Date: 11/25/2021 8:54:22 AM

### SUBSTANCE INFORMATION

Ag-HEC particles dispersed in water. Ag content of aerosol particles at NF was 1.1% according to the ICP-MS analysis of collected particles. The fraction of Ag in the NF was used to calculate emission rate of Ag.

### EXPOSURE LIMITS

| Limit value    | Type | Source    | Notes |
|----------------|------|-----------|-------|
| REL: 0.9 ug/m3 | TWA  | NIOSH REL |       |

### TASK INFORMATION

RWC conditions: Room volume 600 to 735 m<sup>3</sup>; General ventilation 1.25 to 5 ACH; NF volume min 0.5 m<sup>3</sup>, mode 1.5 m<sup>3</sup>, max 4 m<sup>3</sup>;  $\beta = 2.8$  m<sup>3</sup>/min (GSD = 1.477).

#### TASK 1 - T1.1

Description: 1 nozzle

Model: M201

Model Name: 2Box.CE.Gv

| Variable     | Variable Model               | Units               |
|--------------|------------------------------|---------------------|
| 1: Frequency | ~ ConstantInt (1, , )        | /shift              |
| 2: Duration  | ~ ConstantInt (180, , )      | min                 |
| 3: G (Ag)    | ~ Uniform (0.0286, 0.0572, ) | mg/min              |
| 4: Q         | ~ Uniform (1.25, 5, )        | ACH                 |
| 5: V         | ~ Uniform (600, 735, )       | m <sup>3</sup>      |
| 6: Vn        | ~ Triangular (1.5, 0.5, 4 )  | m <sup>3</sup>      |
| 7: $\beta$   | ~ Lognormal (2.8, 1.477, )   | m <sup>3</sup> /min |

|        |                      |     |
|--------|----------------------|-----|
| 8: tg  | ~ Constant (180, , ) | min |
| 9: t1  | ~ Constant (0, , )   | min |
| 10: t2 | ~ Constant (180, , ) | min |

## TASK 2 - Break

Description: 1 nozzle

Model: M201

Model Name: 2Box.CE.Gv

| Variable     | Variable Model              | Units               |
|--------------|-----------------------------|---------------------|
| 1: Frequency | ~ ConstantInt (1, , )       | /shift              |
| 2: Duration  | ~ ConstantInt (60, , )      | min                 |
| 3: G         | ~ Constant (0, , )          | mg/min              |
| 4: Q         | ~ Uniform (1.25, 5, )       | ACH                 |
| 5: V         | ~ Uniform (600, 735, )      | m <sup>3</sup>      |
| 6: Vn        | ~ Triangular (1.5, 0.5, 4 ) | m <sup>3</sup>      |
| 7: β         | ~ Lognormal (2.8, 1.477, )  | m <sup>3</sup> /min |
| 8: tg        | ~ Constant (0, , )          | min                 |
| 9: t1        | ~ Constant (0, , )          | min                 |
| 10: t2       | ~ Constant (60, , )         | min                 |

## TASK 3 - T1.2

Description: 1 nozzle

Model: M201

Model Name: 2Box.CE.Gv

| Variable     | Variable Model               | Units               |
|--------------|------------------------------|---------------------|
| 1: Frequency | ~ ConstantInt (1, , )        | /shift              |
| 2: Duration  | ~ ConstantInt (180, , )      | min                 |
| 3: G (Ag)    | ~ Uniform (0.0286, 0.0572, ) | mg/min              |
| 4: Q         | ~ Uniform (1.25, 5, )        | ACH                 |
| 5: V         | ~ Uniform (600, 735, )       | m <sup>3</sup>      |
| 6: Vn        | ~ Triangular (1.5, 0.5, 4 )  | m <sup>3</sup>      |
| 7: β         | ~ Lognormal (2.8, 1.477, )   | m <sup>3</sup> /min |
| 8: tg        | ~ Constant (180, , )         | min                 |
| 9: t1        | ~ Constant (0, , )           | min                 |
| 10: t2       | ~ Constant (180, , )         | min                 |

## TASK 4 - Break

Description: 1 nozzle

Model: M201

Model Name: 2Box.CE.Gv

| Variable     | Variable Model         | Units  |
|--------------|------------------------|--------|
| 1: Frequency | ~ ConstantInt (1, , )  | /shift |
| 2: Duration  | ~ ConstantInt (60, , ) | min    |

|        |                             |                     |
|--------|-----------------------------|---------------------|
| 3: G   | ~ Constant (0, , )          | mg/min              |
| 4: Q   | ~ Uniform (1.25, 5, )       | ACH                 |
| 5: V   | ~ Uniform (600, 735, )      | m <sup>3</sup>      |
| 6: Vn  | ~ Triangular (1.5, 0.5, 4 ) | m <sup>3</sup>      |
| 7: β   | ~ Lognormal (2.8, 1.477, )  | m <sup>3</sup> /min |
| 8: tg  | ~ Constant (0, , )          | min                 |
| 9: t1  | ~ Constant (0, , )          | min                 |
| 10: t2 | ~ Constant (60, , )         | min                 |

### TWA CALCULATION (TASK OR FULL SHIFT)

Task TWA - the TWA is calculated for the duration of the task(s).

### SIMULATION OPTIONS

Unless noted below, for all variables modeled with a statistical distribution a random value was generated for each repeat of a task.

#### Room Variables:

- For each TWA, the room ventilation rate Q generated for the first Box model task was used for all of the following Box model tasks.
- For each TWA, the room volume V generated for the first Box model task was used for all of the following Box model tasks.

#### Options for 2Box variables t1, t2, and tg:

- If a random t1, t2 or tg > 0, apply following rules:
  1. if tg > Duration, let tg = Duration
  2. if t2 > Duration, let t2 = Duration
  3. if t1 > t2, let t1 = 1/2 t2

#### Options for 2Box Constant Emission Model variables t2 and tg:

- tg is not linked to task Duration (DEFAULT)
- t2 is always equal to task Duration (DEFAULT)

---

## STATISTICS

---

Output Units:  $\mu\text{g}/\text{m}^3$   
Simulation N: 10000

### Non-parametric Statistics

Min: 4.456  
Max: 40.410  
Median: 12.765  
Mode: 12.589  
Fraction>REL: 100.000%  
X0.05: 7.912  
X0.50: 12.762  
X0.60: 13.761  
X0.70: 14.877  
X0.75: 15.548  
X0.80: 16.312  
X0.90: 18.501  
X0.95: 20.529  
X0.99: 25.515  
X0.999: 32.235

### Normal Distribution Statistics

Mean: 13.348  
SD: 3.979

### Lognormal Distribution Statistics

GM: 12.797  
GSD: 1.337

X0.95: 20.624  
X0.99: 25.129  
Fraction>REL: 100.000%

---

GRAPHS

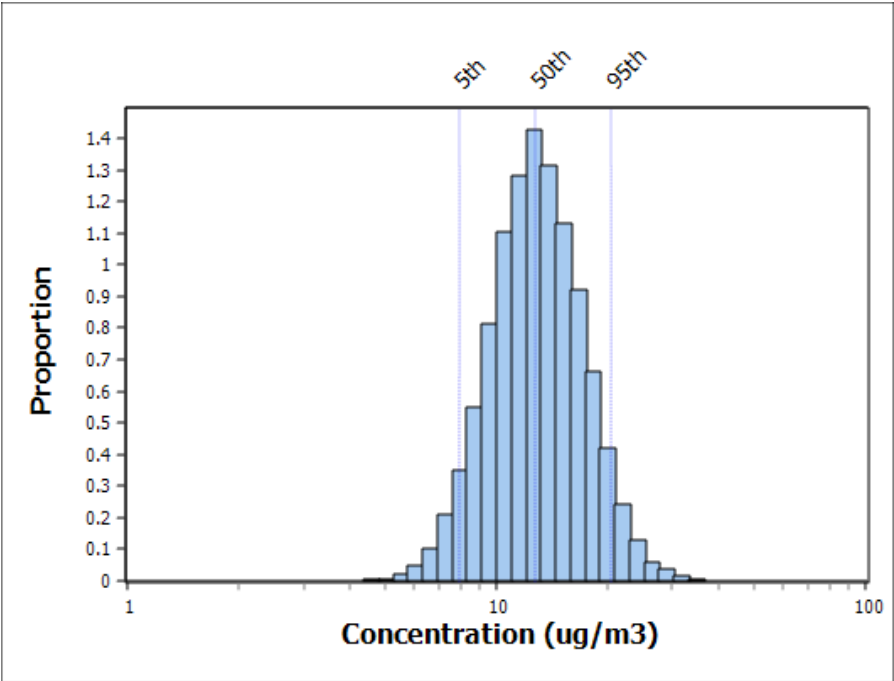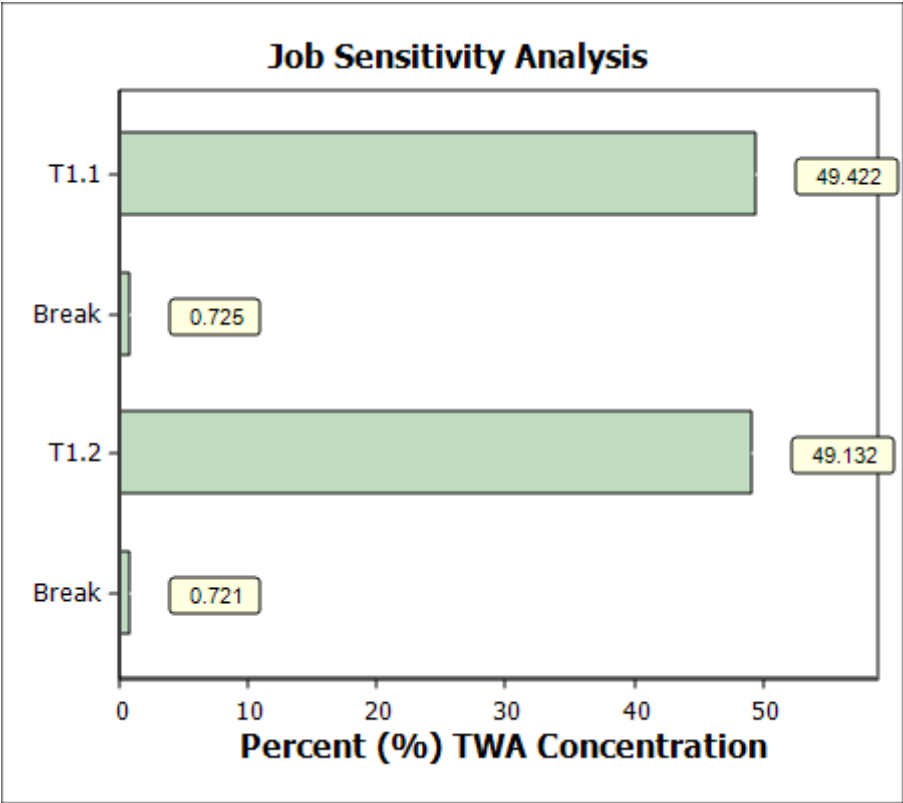

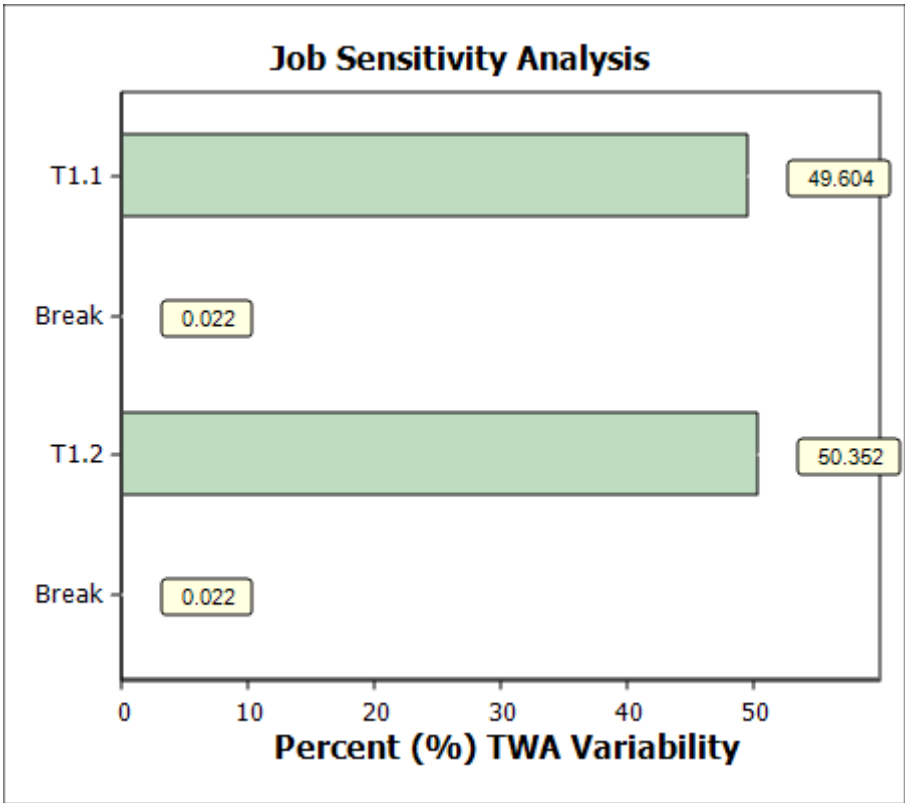

Supplement: s1 [file s1]
