# Supplementary material for: Quantifying Emission Factors and Setting Conditions of Use According to ECHA Chapter R.14 for a Spray Process Designed for Nanocoatings—A Case Study
Source: Nanomaterials (Basel). 2022 Feb 10;12(4):596. doi: 10.3390/nano12040596 (PMC8876979; doi:10.3390/nano12040596)
Supplement: Supplementary file 1 [file nanomaterials-12-00596-s001.zip › nanomaterials-1531087-Supplementary Material 2-proof done.xlsx]

## Sheet: Supplementary material 1
		Supplementary Material 2 for Quantifying emission factors and setting Conditions of Use according to ECHA Chapter R.14 for a spray process designed for nanocoatings – A case study.
		Antti Joonas Koivisto1,2,3,*, Benedetta Del Secco4, Sara Trabucco4, Alessia Nicosia4, Fabrizio Ravegnani4, Marko Altin5, Joan Cabellos6, Irini Furxhi7,8, Magda Blosi9, Anna Costa10, Jesús Lopez de Ipiña11, Franco Belosi4
		1Air Pollution Management APM, Mattilanmäki 38, 33610 Tampere, Finland.
		2Institute for Atmospheric and Earth System Research (INAR), University of Helsinki, PL 64, FI-00014 UHEL, Helsinki, Finland.
		3ARCHE Consulting, Liefkensstraat 35D, Wondelgem B-9032, Belgium.
		4CNR-ISAC, Institute of Atmospheric Sciences and Climate-National Research Council of Italy, Via Go-betti, 101, 40129 Bologna, Italy.
		5Witek srl, Via Siena 47, 50142 Firenze, Italy.
		6Leitat Technological Center, c/de la Innovació 2, Terrassa, Barcelona, Spain.
		7Transgero Limited, Cullinagh, Newcastle West, Co. Limerick, Limerick, V42 V384, Ireland.
		8Department of Accounting and Finance, Kemmy Business School, University of Limerick, Limerick, V94 T9PX, Ireland.
		9ISTEC-CNR, Institute of Science and Technology for Ceramics, CNR, National Research Council, Via Granarolo 64, 48018, Faenza, Italy
		10Consiglio Nazionale delle Ricerche - Institute of science and technology for ceramics (ISTEC), Via Granarolo 64, 48018 Faenza, Italy.
		11TECNALIA Research and Innovation - Basque Research and Technology Alliance (BRTA), Parque Tecnológico de Alava, Leonardo Da Vinci 11, 01510 Miñano, Spain.
		*Author to whom correspondence should be addressed. Tel: +358 407 222 029; e-mail: joonas.apm@gmail.com
		Table of Content
		Table S1: Test times for TiO2-N and Ag-HEC coating processes.
		Figure S1: Particle concentrations measured at the NF during A) TiO2-N coating and B) Ag-HEC coating. Sub-plot shows modelled mass concentrations for Test 1 spray cycle.
		Table S2: The gravimetric sampler sampling times and concentrations.
		Table S3.1: Near-Field process particle concentrations (background subtracted) measured by the SMPS (0.01 to 0.75 µm) and OPS (0.75 µm to 10 µm).
		Table S3.2: Mass distributions calculated from the number size distributions by using TiO2 and Ag-HEC process emission densities and spherical particle assumption.
		Table S4.1: Far-Field process particle concentrations (background subtracted) measured by the OPS (0.25 µm to 10 µm).
		Table S4.2: Mass distributions are calculated from the number size distributions by using TiO2 and Ag-HEC process emission densities and spherical particle assumption.
		Figure S4.1: FF particle number size and mass size distributions for TiO2-N experiments. Grey lines show the respective NF average size distributions.
		Figure S4.2: FF particle number size and mass size distributions for Ag-HEC experiments. Grey lines show the respective NF average size distributions.
		Table S5.1: Parametrization of individual spray tests for emission rate quantification. Modelled concentrations are shown in Figures S5.1-S5.22. Geometric Mean (GM) and Geometric Standard Deviation (GSD) are given next to the concentration distribution figures.
		Table S5.2: Mass emission rates assigned by setting the emission rate to produce NF concentration corresponding the measured NF concentration.
		Table S6: Sprayed suspension volumes, mass flows of TiO2 and Ag-HEC NPs to LEV exhaust and room air, calculated transfer efficiencies and emission factors to room and environment.
		Table S7.1: Reasonable worst-case (RWC) estimates: Two 3-h continuous sprayings during 8-h work shift, where worker is 10% in NF and 90% in FF. Generation rate follows linear distribution within G_min and G_max range and other parametrization follows Table 1 parametrization. Recommended exposure limit (REL) is 300 μg/m3 for TiO2 and 0.9 μg/m3 for Ag.
		Table S7.2: Exposures in test 12 Ag-HEC under different RWC conditions. Generation rate follows linear distribution within G_min and G_max range and other parametrization follows Table 1 parametrization. Table S7.3: Exposures in test 12 Ag-HEC including LEV at NF with Q = 10 m3/min and 80% reduction in emissions from the chamber to the room under Table 1 conditions and worst-case conditions.
		Figure S8.1: NF particle number concentration as a function of suspension flow rate.
		Figure S8.2: NF particle number concentration as a function of Ag-HEC concentration for suspension flow rate of 200 and 400 mL/min.
		Figure S8.3: NF mass concentration as a function of flow rate.
		Figure S8.4: NF mass concentration as a function of Ag-HEC concentration for suspension flow rate of 200 and 400 mL/min.
		Figure S8.5: TiO2 emission rate from the chamber to the NF volume as a function of flow rate.
		Figure S8.6: Ag-HEC emission rate from the chamber to the NF volume as a function of Ag-HEC concentration for suspension flow rates of 200 and 400 mL/min.
		Table S8: NF mass concentrations in μg/m3 under different process conditions.
		Table S9.1: Deposition fractions and deposited mass rates (µg/min) for each of the process.
		Table S9.2: Deposited mass (as µg/day) for each of the process under RWC conditions where worker performs two 3-h spraying tasks during the 8-h work shift and spends during the 8-h work shift 10% at the NF and 90% at FF. The total time in the NF is 36 min.

## Sheet: S1. Spray times
		Table S1: Test times for TiO2-N and Ag-HEC coating processes
		TiO2 Spray times and breaks				Ag-HEC spray times and breaks
		Break	12 min			Break	10 min
		1	09:37:00	09:39:00		1	09:33:00	09:35:00
		2	09:47:00	09:49:00		2	09:43:00	09:44:00
		3	09:56:00	09:58:00		3	09:52:00	09:54:00
		4	10:06:00	10:08:00		4	10:02:00	10:04:00
		Break	15 min			Break	16 min
		1	10:23:00	10:25:00		1	10:20:00	10:22:00
		2	10:32:00	10:34:00		2	10:31:00	10:33:00
		3	10:42:00	10:44:00		3	10:41:00	10:42:00
		4	10:51:00	10:53:00		4	10:50:00	10:52:00
		Break	14 min			Break	23 min
		1	11:07:00	11:10:00		1	11:15:00	11:17:00
		2	11:16:00	11:19:00		2	11:24:00	11:25:00
		3	11:26:00	11:28:00		3	11:34:00	11:35:00
		4	11:41:00	11:43:00		4	11:43:00	11:45:00
		Break	28 min			Break	17 min
		1	00:11:00	00:13:00		1	00:02:00	00:03:00
		2	00:20:00	00:22:00		2	00:11:00	00:13:00
		3	00:29:00	00:31:00		3	00:20:00	00:22:00
		4	00:38:00	00:40:00		4	00:30:00	00:32:00
		Break	8 min (+lunch break 69 min, sampler off)			Break	16 min (+lunch break 96 min, sampler off)
		Break	10 min			Break	17 min
		1	14:07:00	14:09:00		1	14:14:00	14:15:00
		2	14:18:00	14:20:00		2	14:23:00	14:24:00
		3	14:27:00	14:29:00		3	14:33:00	14:34:00
		4	14:37:00	14:39:00		4	14:42:00	14:44:00
		Break	14 min			Break	14 min
		1	14:53:00	14:56:00		1	14:58:00	15:00:00
		2	15:02:00	15:05:00		2	15:07:00	15:09:00
		3	15:12:00	15:14:00		3	15:16:00	15:18:00
		4	15:22:00	15:24:00		4	15:26:00	15:28:00
		Break	10 min			Break	2 min
		Total break time: 111 min				Total break time: 115 min
		Break per test: 18.5 min				Break per test: 19 min
		Total PM collection time: 369 min				Total PM collection time: 368 min
											Figure S1: Particle concentrations measured at the NF during A) TiO2-N coating and B) Ag-HEC coating. Sub-plot shows modelled mass concentrations for Test 1 spray cycle.

## Sheet: S2. Gravimetric measurmenets
		Table S2: The gravimetric sampler sampling times and concentrations.
		Date	Material	Position	Collection time [hh:mm]	Sample weight, [mg]	Sample volume, [m3]	Concentration, [µg/m3]	Ti weight, [mg]	Ag weight, [mg]	Ti concentration, [µg/m3]	Ag concentration, [µg/m3]	TiO2 concentration, [µg/m3]	NM fraction from total concentration
		15.02.2021	Background	SPRAY CHAMBER	12:10 - 16:10	0.23	12.13	19 ± 2	<0.002	0	-	-	-	-		TiO2 atomic mass	79.866
		15.02.2021	Background	NEAR FIELD	12:10 - 16:10	0.28	10.171	28 ± 3	<0.002	0	-	-	-	-		Ti atomic mass	47.867
		16.02.2021	TiO2-N	SPRAY CHAMBER	09:25 - 15:34 (lunch break 12:48-13:57)	16.95	13.92	1217 ± 1	6.48	0	465.517	-	776.715	0.648331		TiO2/Ti	1.6685
		16.02.2021	TiO2-N	NEAR FIELD	09:25 - 15:34 (lunch break 12:48-13:57)	1.49	12.388	120 ± 2	0.304	0	24.5399	-	40.9447	0.444565
		17.02.2021	Ag-HEC	SPRAY CHAMBER	9:23 - 15:30 (lunch break 12:34 - 14:10)	2.66	13.92	191 ± 2	<0.005	0.184	-	13.2184	-	0.0767442
		17.02.2021	Ag-HEC	NEAR FIELD	9:23 - 15:30 (lunch break 12:34 - 14:10)	0.73	11.322	65 ± 3	<0.006	0.004	-	0.353294	-	0.0108108

## Sheet: S3. Near Field
				NOTES
				Particle number concentrations are averaged from start of spraying to start of the next spraying
				Particle mass concentrations are calculated from particle number concentrations assuming spherical particles with diameter of bin geometric mean size (Dp)
				TiO2-N process emissions density = 2.1 g/cm3
				Ag-HEC process emissions density = 6.5 g/cm3
													Bin no.	Dp1	Dp2	Dp3	Dp4	Dp5	Dp6	Dp7	Dp8	Dp9	Dp10	Dp11	Dp12	Dp13	Dp14	Dp15	Dp16	Dp17	Dp18	Dp19	Dp20	Dp21	Dp22	Dp23	Dp24	Dp25	Dp26	Dp27	Dp28	Dp29	Dp30	Dp31	Dp32	Dp33	Dp34	Dp35	Dp36
													Dp, [m]	1.025e-08	1.222e-08	1.457e-08	1.739e-08	2.077e-08	2.483e-08	2.971e-08	3.561e-08	4.275e-08	5.143e-08	6.205e-08	7.511e-08	9.132e-08	1.1162e-07	1.3737e-07	1.7049e-07	2.1377e-07	2.713e-07	3.4904e-07	4.5552e-07	6.0277e-07	7.37e-07	8.69e-07	1.024e-06	1.207e-06	1.423e-06	1.677e-06	1.977e-06	2.33e-06	2.747e-06	3.238e-06	3.817e-06	4.499e-06	5.303e-06	6.251e-06	7.369e-06
				Table S3.1: Near-Field process particle concentrations (background subtracted) measured by the SMPS (0.01 to 0.75 µm) and OPS (0.75 µm to 10 µm)									dLog10(Dpi)	0.0763473	0.0763678	0.0766142	0.0769885	0.0773386	0.0777331	0.0782976	0.0790167	0.0798223	0.0809028	0.0822406	0.0839121	0.0860221	0.088663	0.0919784	0.0960274	0.100875	0.106464	0.112529	0.118638	0.10448	0.0794341	0.0714162	0.0713437	0.0714525	0.0714129	0.0714009	0.0714114	0.071426	0.0714605	0.0714318	0.0714196	0.0713997	0.0714168	0.0714435	0.0714352
				Test No.	Material	Concentration, [wt.%]	Suspension flow rate, [mL/min]	No. of nozzles	Substrate	Spray time, [mm:ss]	Distribution	Bin concentration normalized with logartihmic width of the bin i	Total concentration
				1	TiO2-N	1	200	1	PMMA	06:15:00	Number	dN/dLog10(Dpi), [1/cm3]	6054.56	5612.97	3600.7	3338.09	2574.31	3773.71	3710.3	4394.42	5159.53	4858.21	3907.59	5241.58	5082.63	4939.9	5546.57	4348.61	2913.49	1461.99	1126.83	730.341	268.891	67.4105	102.764	75.8642	34.043	14.433	7.3735	5.74466	4.29563	2.74543	0.951288	0.237789	0.00219533	-0.0585504	-0.060669	-0.0511074	-0.0423033
				2	TiO2-N	1	400	2	PMMA	07:33:00	Number	dN/dLog10(Dpi), [1/cm3]	8371.3	-6913.34	1663.93	4142.59	6327.16	5460.06	5398.18	7865.01	8278.45	8413.3	8774.76	9842.19	9173.68	7589.98	5688.41	6174.66	4345	2543.2	2675.47	1077.79	427.658	155.927	144.512	60.0163	48.4563	21.869	10.746	8.01463	5.30985	3.89799	1.28798	0.239054	0.169534	-0.0357485	-0.0341812	0.000951275	0.000882507
				3	TiO2-N	1	800	4	PMMA	09:38:00	Number	dN/dLog10(Dpi), [1/cm3]	3807.41	2080.03	2043.22	201.02	1960.3	943.522	-499.521	499.707	562.656	513.35	2506.76	472.199	1899.32	4071.27	5932.73	7256.16	5365.83	2619.26	1645.68	903.145	610.55	299.61	334.967	167.237	140.611	68.5362	37.7196	29.6177	22.7158	18.3635	11.4833	5.16908	3.06995	1.61209	0.713427	0.273077	0.113885
				4	TiO2-N	1	200	1	TEXTILE	06:18:00	Number	dN/dLog10(Dpi), [1/cm3]	515.98	692.995	1317.49	1786.9	264.13	2727.27	197.382	720.336	-386.602	148.221	-128.68	-1495.59	-338.614	273.281	-397.801	414.602	-424.149	-100.681	339.099	325.864	211.975	145.945	105.374	33.949	25.9164	10.7399	5.39492	3.533	2.77105	1.69562	0.674761	0.225151	0.0383721	0.0753426	-0.004797	0.0343031	-0.0200051
				5	TiO2-N	1	400	2	TEXTILE	07:49:00	Number	dN/dLog10(Dpi), [1/cm3]	3036.6	1300.27	1671.25	2076.62	2282.32	1883.6	4426.55	4324	1459.91	3626.3	1676.11	2241.68	3751.04	2039.99	1954.91	1291.59	-399.342	728.987	123.735	327.391	230.633	62.2492	111.778	59.0452	49.9135	21.6589	10.5964	7.94026	5.15156	3.4384	1.47966	0.552511	0.340667	0.145465	0.154764	0.146791	0.0970965
				6	TiO2-N	1	800	4	TEXTILE	10:02:00	Number	dN/dLog10(Dpi), [1/cm3]	6666.66	1467.55	-1453.98	278.885	275.915	-1149.21	1608.62	4534.8	2944.96	4964.8	8361.83	9330.46	11096.7	7728.12	7857.91	6244.73	4506.18	4576.69	2011.68	710.361	305.687	69.8466	270.049	186.15	151.274	74.1542	38.8868	29.5191	21.5667	16.6038	10.7739	4.93402	2.33281	1.0909	0.641196	0.221359	0.0924337
				1 to 6	TiO2-N	1	Varying	Varying	Varying	1 day, 23:35:00	Number	dN/dLog10(Dpi), [1/cm3]	4742.09	706.744	1473.77	1970.68	2280.69	2273.16	2473.59	3723.04	3003.15	3754.03	4183.06	4272.09	5110.8	4440.42	4430.45	4288.39	2717.83	1971.57	1320.42	679.149	342.566	133.498	178.241	97.0436	75.0356	35.2319	18.4529	14.0616	10.3018	7.79079	4.44182	1.89293	0.992255	0.471583	0.234957	0.104229	0.0403315
				7	Ag-HEC	0.01	200	1	TEXTILE	06:10:00	Number	dN/dLog10(Dpi), [1/cm3]	38.4758	2936.02	3445.49	833.935	1965.58	2357.28	800.907	408.561	239.855	-2364.42	-3356.76	-2415.53	-1984.71	-882.661	-385.942	-467.492	108.784	-15.8428	-10.4981	-27.4351	98.6277	9.63527	9.61236	4.4202	4.85546	3.57382	1.66111	0.537374	0.0884755	-0.219685	-0.22732	-0.260084	-0.16962	-0.125151	-0.074781	-0.0460579	-0.00948852
				8	Ag-HEC	0.01	400	2	TEXTILE	05:52:00	Number	dN/dLog10(Dpi), [1/cm3]	3398.46	-1194.08	16.4396	557.435	-406.63	264.402	1269.73	2268.67	5220.87	6650.42	8520.67	8023.31	6077.26	1883.18	266.864	472.736	331.079	591.432	253.308	240.367	57.1679	-28.9121	-13.6916	-6.26587	5.08798	3.90923	1.53687	0.609899	0.214308	-0.0348436	0.162882	-0.00536012	-0.0172815	-0.0169708	0.00788419	-0.0101195	0.0254436
				9	Ag-HEC	0.05	200	1	TEXTILE	05:46:00	Number	dN/dLog10(Dpi), [1/cm3]	652.174	1183.38	816.819	1120.04	-29.0687	676.255	1331.63	-673.219	131.508	1060.32	1322.62	102.655	802.754	381.997	-318.758	252.32	155.981	-117.218	-251.753	101.587	57.8415	47.7276	42.9654	28.0569	11.9743	10.4636	4.44292	1.46977	0.449399	0.227392	0.127301	-0.00216485	-0.00311895	0.0327581	0.000863545	-0.000773035	0.00636539
				10	Ag-HEC	0.05	400	2	TEXTILE	06:57:00	Number	dN/dLog10(Dpi), [1/cm3]	2422.34	1972.93	300.638	601.057	1331.68	2655.52	2276.08	3889.2	3715.45	4874.01	3095.83	2359.17	1543.26	762.601	36.8046	-441.513	177.657	313.406	199.065	142.113	121.282	121.427	97.9533	59.32	20.1196	18.1898	8.03805	2.34221	0.793803	0.374257	0.0546501	-0.111646	-0.0777142	-0.0593806	-0.0373443	-0.0574825	-0.0321176
				11	Ag-HEC	0.1	200	1	TEXTILE	05:48:00	Number	dN/dLog10(Dpi), [1/cm3]	1893.66	962.936	-188.009	1851.65	2445.68	1448.46	2365.93	2460.42	1059.84	1470.16	1710.97	1438.95	364.836	997.041	1054.33	843.577	1262.91	997.814	223.73	25.4575	64.7524	43.3821	45.8585	31.1128	19.8707	17.3612	7.79271	5.79825	1.94647	0	0	0	0	0	0	0	0
				12	Ag-HEC	0.1	400	2	TEXTILE	06:59:00	Number	dN/dLog10(Dpi), [1/cm3]	3707.84	6927.58	6962.91	5471.59	6366.58	5399.26	5908.01	5606.64	3204.63	1278.8	180.39	263.542	467.447	-1643.32	-53.9025	-590.692	707.753	223.861	396.347	73.0608	141.047	134.892	126.015	76.5881	24.2271	22.3747	10.4874	3.52108	1.28957	0.481533	0.0907632	-0.0578275	-0.0453444	-0.0539196	-0.0311073	-0.0307628	0.0012054
				7 to 12	Ag-HEC	Varying	Varying	Varying	TEXTILE	1 day, 13:32:00	Number	dN/dLog10(Dpi), [1/cm3]	2018.82	2131.46	1892.38	1739.29	1945.64	2133.53	2325.38	2326.71	2262.03	2161.55	1912.28	1628.68	1211.81	249.806	99.8998	11.4893	457.36	332.242	135.033	92.5251	90.1199	54.6919	51.4522	32.2054	14.3558	12.6454	5.65984	2.37976	0.797005	0.138109	0.0347129	-0.0728471	-0.0521799	-0.0371106	-0.0224141	-0.0241993	-0.00143195
				Table S3.2: Mass distributions calculated from the number size distributions by using TiO2 and Ag-HEC process emission densities and spherical particle assumption									94
				Test No.	Material	Concentration, [wt.%]	Suspension flow rate, [mL/min]	No. of nozzles	Substrate	Spray time, [mm:ss]	Distribution	Bin concentration normalized with logartihmic width of the bin i	Total concentration
				1	TiO2-N	1	200	1	PMMA	06:15:00	mass	dm/dLog10(Dpi) , [ug/m3]	35.5761	0.00664633	0.00722467	0.0113526	0.014886	0.0371788	0.0624536	0.126715	0.256179	0.417352	0.584489	1.37691	2.3681	4.1365	8.48142	12.3949	15.8755	15.7037	24.7414	34.1483	27.9458	16.2331	45.2337	54.7411	40.1926	27.9059	23.3618	29.7908	36.4976	38.1853	21.6823	8.87645	0.134241	-5.86267	-9.94831	-13.7262	-18.6131
				2	TiO2-N	1	400	2	PMMA	07:33:00	mass	dm/dLog10(Dpi) , [ug/m3]	59.8061	-0.00818611	0.00333861	0.0140886	0.0365869	0.0537929	0.0908648	0.226791	0.411039	0.722758	1.31251	2.58544	4.2742	6.3556	8.69831	17.5997	23.6758	27.3174	58.7445	50.394	44.4465	37.5486	63.61	43.3059	57.2095	42.2832	34.0472	41.5624	45.1149	54.2159	29.3565	8.92371	10.3667	-3.57951	-5.60493	0.255489	0.388295
				3	TiO2-N	1	800	4	PMMA	09:38:00	mass	dm/dLog10(Dpi) , [ug/m3]	202.573	0.00246297	0.00409965	0.000683653	0.0113355	0.00929565	-0.00840817	0.0144092	0.0279368	0.0441002	0.374956	0.124042	0.884929	3.40915	9.0719	20.6824	29.2383	28.1344	36.1338	42.228	63.4543	72.1488	147.442	120.673	166.01	132.513	119.509	153.592	193.004	255.412	261.734	192.957	187.722	161.419	116.986	73.3419	50.1083
				4	TiO2-N	1	200	1	TEXTILE	06:18:00	mass	dm/dLog10(Dpi) , [ug/m3]	25.1313	0.000820578	0.0026435	0.0060771	0.00152733	0.0268692	0.00332244	0.0207712	-0.0191954	0.0127331	-0.0192477	-0.392876	-0.157767	0.228836	-0.608288	1.18175	-2.31118	-1.08145	7.4455	15.2363	22.0306	35.1449	46.3823	24.4965	30.5979	20.7654	17.093	18.3215	23.5441	23.5838	15.3796	8.40469	2.34639	7.54408	-0.786598	9.21296	-8.80207
				5	TiO2-N	1	400	2	TEXTILE	07:49:00	mass	dm/dLog10(Dpi) , [ug/m3]	49.4701	0.00153965	0.00335331	0.00706243	0.0131975	0.0185574	0.0745098	0.124684	0.072487	0.311523	0.250709	0.588866	1.74768	1.70822	2.9893	3.68143	-2.176	7.8303	2.71682	15.3077	23.9696	14.9902	49.2012	42.6051	58.9299	41.8771	33.573	41.1767	43.77	47.8236	33.7254	20.6248	20.8312	14.5655	25.3777	39.4246	42.7216
				6	TiO2-N	1	800	4	TEXTILE	10:02:00	mass	dm/dLog10(Dpi) , [ug/m3]	181.537	0.00173774	-0.00291736	0.000948467	0.00159548	-0.0113221	0.027077	0.130763	0.146222	0.426509	1.25074	2.45102	5.17019	6.47127	12.0158	17.7995	24.5541	49.1597	44.1699	33.2141	31.77	16.8197	118.867	134.32	178.6	143.376	123.207	153.081	183.241	230.937	245.566	184.183	142.647	109.232	105.141	59.4515	40.67
				1 to 6	TiO2-N	1	Varying	Varying	Varying	1 day, 23:35:00	Mass	dm/dLog10(Dpi) , [ug/m3]	92.3488	0.000836858	0.00295706	0.00670214	0.0131881	0.0223953	0.0416366	0.107355	0.149111	0.322496	0.625693	1.12223	2.38122	3.71826	6.77473	12.2233	14.8094	21.1773	28.992	31.7548	35.6028	32.1475	78.4562	70.0236	88.5901	68.1201	58.4651	72.9207	87.5286	108.36	101.241	70.6617	60.6747	47.2198	38.5275	27.9934	17.7455
				7	Ag-HEC	0.01	200	1	TEXTILE	06:10:00	mass	dm/dLog10(Dpi) , [ug/m3]	-4.8782	0.0107607	0.0213982	0.00877855	0.0351805	0.0718841	0.0417277	0.036465	0.0368618	-0.628703	-1.55411	-1.96404	-2.86222	-2.28772	-1.82667	-4.12441	1.83474	-0.526725	-0.713465	-3.97049	31.7273	7.18176	13.0962	9.87219	17.7436	21.3878	16.2901	8.62556	2.32678	-9.4576	-16.0371	-30.0508	-32.1038	-38.7876	-37.9549	-38.2882	-12.9222
				8	Ag-HEC	0.01	400	2	TEXTILE	05:52:00	mass	dm/dLog10(Dpi) , [ug/m3]	17.8694	-0.00437641	0.000102098	0.00586793	-0.00727796	0.00806281	0.0661535	0.202484	0.802363	1.76835	3.94489	6.52366	8.76422	4.88091	1.26307	4.17067	5.58394	19.6633	17.2151	34.7867	18.3902	-21.55	-18.6539	-13.9944	18.5933	23.3951	15.0717	9.78969	5.636	-1.50004	11.4911	-0.619323	-3.27084	-5.25972	4.0016	-8.4124	34.651
				9	Ag-HEC	0.05	200	1	TEXTILE	05:46:00	mass	dm/dLog10(Dpi) , [ug/m3]	31.4804	0.00433719	0.00507284	0.0117903	-0.00052028	0.020622	0.0693785	-0.0600864	0.0202106	0.281941	0.612344	0.0834675	1.15768	0.990077	-1.50869	2.22607	2.63075	-3.89714	-17.1095	14.7019	18.6069	35.5743	58.5374	62.663	43.7583	62.6205	43.5708	23.5918	11.8185	9.78938	8.98093	-0.250133	-0.590319	10.1526	0.43829	-0.642628	8.66888
				10	Ag-HEC	0.05	400	2	TEXTILE	06:57:00	mass	dm/dLog10(Dpi) , [ug/m3]	52.4342	0.00723094	0.00186711	0.00632712	0.0238347	0.0809786	0.118585	0.34712	0.571004	1.29601	1.4333	1.91821	2.22558	1.97655	0.174197	-3.89521	2.99634	10.4198	13.5287	20.567	39.015	90.5068	133.455	132.487	73.5242	108.858	78.8274	37.5957	20.8759	16.112	3.85548	-12.8999	-14.7089	-18.4037	-18.954	-47.7855	-43.7401
				11	Ag-HEC	0.1	200	1	TEXTILE	05:48:00	mass	dm/dLog10(Dpi) , [ug/m3]	53.1962	0.00352924	-0.00116763	0.0194917	0.0437734	0.0441702	0.123266	0.219598	0.16288	0.390917	0.792143	1.16999	0.526143	2.58418	4.99018	7.44239	21.3	33.1743	15.205	3.68429	20.83	32.3353	62.4791	69.4881	72.6146	103.899	76.4214	93.0696	51.1893	0	0	0	0	0	0	0	0
				12	Ag-HEC	0.1	400	2	TEXTILE	06:59:00	mass	dm/dLog10(Dpi) , [ug/m3]	71.2992	0.0253901	0.0432431	0.0575976	0.113951	0.164648	0.30781	0.500406	0.4925	0.340034	0.083517	0.214283	0.67412	-4.25923	-0.255122	-5.21133	11.9369	7.44271	26.9362	10.5736	45.3732	100.543	171.687	171.054	88.5346	133.903	102.847	56.5181	33.914	20.7303	6.40321	-6.68155	-8.58227	-16.7112	-15.7885	-25.5733	1.64161
				7 to 12	Ag-HEC	Varying	Varying	Varying	TEXTILE	1 day, 13:32:00	Mass	dm/dLog10(Dpi) , [ug/m3]	36.9002	0.00781197	0.0117526	0.0183089	0.0348235	0.0650609	0.121154	0.207665	0.347637	0.574758	0.885348	1.32426	1.74759	0.64746	0.472828	0.101364	7.71377	11.046	9.17702	13.3905	28.9904	40.7652	70.1	71.9282	52.4615	75.6774	55.5048	38.1984	20.9601	5.94568	2.44894	-8.41696	-9.87601	-11.5016	-11.3762	-20.117	-1.95014
													39
[truncated: 1 more columns]

## Sheet: S4. Far Field
						NOTES
						Particle number concentrations are averaged from start of spraying to start of the next spraying
						Particle mass concentrations are calculated from particle number concentrations assuming spherical particles with diameter of bin geometric mean size (Dp)
						TiO2-N process emissions density = 2.1 g/cm3
						Ag-HEC process emissions density = 6.5 g/cm3
															Bin no.	Dp1	Dp2	Dp3	Dp4	Dp5	Dp6	Dp7	Dp8	Dp9	Dp10	Dp11	Dp12	Dp13	Dp14	Dp15	Dp16	Dp17	Dp18	Dp19	Dp20	Dp21	Dp22	Dp23	Dp24
															Dp, [m]	2.5e-07	2.8e-07	3e-07	3.5e-07	4e-07	4.5e-07	5e-07	5.8e-07	6.5e-07	7e-07	8e-07	1e-06	1.3e-06	1.6e-06	2e-06	2.5e-06	3e-06	3.5e-06	4e-06	5e-06	6.5e-06	7.5e-06	8.5e-06	1e-05
						Table S4.1: Far-Field process particle concentrations (background subtracted) measured by the OPS (0.25 µm to 10 µm)									dLog10(Dpi)	0.049218	0.0395906	0.048455	0.0624694	0.0545722	0.048455	0.0551077	0.0569717	0.040835	0.0450883	0.077451	0.105427	0.10206	0.0935433	0.09691	0.0880456	0.073064	0.0624694	0.077451	0.105427	0.0880456	0.0582528	0.0624694	0.0705811
						Test No.	Material	Concentration, [wt.%]	Suspension flow rate, [mL/min]	Nozzle	Substrate	Spray time, [mm:ss]	Distribution	Bin concentration normalized with logartihmic width of the bin i	Total concentration
						1	TiO2-N	1	200	1	PMMA	06:15:00	Number	dN/dLog10(Dpi), [1/cm3]	53.2498	337.793	303.952	174.354	93.0068	62.1871	36.6141	36.419	28.7727	18.2101	13.7239	2.45199	0.70826	0.201829	0.170388	0.0752169	-0.119093	-0.257293	-0.32258	-0.594184	-0.285303	-0.109226	-0.1091	-0.115582	-0.0545418
						2	TiO2-N	1	400	2	PMMA	07:33:00	Number	dN/dLog10(Dpi), [1/cm3]	42.8316	272.86	240.625	118.295	63.6182	50.5018	35.9789	34.423	31.8552	22.4564	17.2502	2.71651	0.821419	0.116748	0.438673	-0.0761709	0.116447	-0.180078	-0.293047	-0.32039	-0.149992	-0.0738101	-0.037448	-0.0988226	-0.0353441
						3	TiO2-N	1	800	4	PMMA	09:38:00	Number	dN/dLog10(Dpi), [1/cm3]	54.5702	138.987	183.627	146.375	107.554	119.15	93.2795	97.9054	90.0118	57.8496	38.6556	6.86097	1.984	1.17714	0.825524	0.376065	-0.0413296	0.137627	0.0749256	0.0774684	0.0544085	0.00252394	-0.00762958	-0.0133399	0.0165295
						4	TiO2-N	1	200	1	TEXTILE	06:18:00	Number	dN/dLog10(Dpi), [1/cm3]	-9.31411	-69.7238	-41.2255	-13.0772	-8.9739	-12.1467	-13.2081	-10.2027	-12.0734	-6.09924	0.464366	-0.541472	-0.382968	-0.32732	-0.417921	-0.344456	-0.306375	-0.241312	-0.222409	-0.173497	-0.0553702	-0.0396101	-0.031329	-0.036718	-0.0195697
						5	TiO2-N	1	400	2	TEXTILE	07:49:00	Number	dN/dLog10(Dpi), [1/cm3]	7.91128	-136.175	-102.749	-39.0991	17.4165	76.7301	66.4842	68.3656	72.2419	46.2835	30.9865	5.11309	1.47301	0.81604	1.08338	0.486036	0.387312	0.344127	0.269983	0.330589	0.128264	0.0384614	0.0565058	0.0524737	0.00900945
						6	TiO2-N	1	800	4	TEXTILE	10:02:00	Number	dN/dLog10(Dpi), [1/cm3]	80.934	357.217	371.499	229.203	138.774	142.397	116.556	109.372	95.6464	61.8542	38.8916	5.24277	-0.378043	-0.176178	-0.823868	-0.972949	-1.24477	-1.19311	-1.08607	-1.43689	-0.582888	-0.166544	-0.1819	-0.211334	-0.0843275
						1 to 6	TiO2-N	1	Varying	Varying	PMMA & Textile		Number	dN/dLog10(Dpi), [1/cm3]	38.3638	150.16	159.288	102.675	68.5659	73.1365	55.9508	56.0471	51.0758	33.4258	23.3287	3.64064	0.70428	0.301376	0.212697	-0.076043	-0.201301	-0.231673	-0.2632	-0.352817	-0.14848	-0.0580341	-0.0518167	-0.0705538	-0.0280407
						7	Ag-HEC	0.01	200	1	TEXTILE	06:10:00	Number	dN/dLog10(Dpi), [1/cm3]	-3.56617	-40.2637	-25.2901	-6.72584	1.59258	5.35881	2.92089	3.46513	0.0195092	-0.8291	-0.182881	-0.503811	-0.463278	-0.651953	-1.40588	-1.25462	-1.39786	-1.5117	-1.4198	-1.66919	-0.520861	-0.143984	-0.106705	-0.081674	-0.0402449
						8	Ag-HEC	0.01	400	2	TEXTILE	05:52:00	Number	dN/dLog10(Dpi), [1/cm3]	9.86172	51.7881	50.146	36.5352	25.7551	16.3487	8.83552	9.39637	2.78099	0.344374	0.748531	0.010087	-0.0844781	-0.156158	-0.228838	-0.0902899	-0.0731155	-0.134728	-0.112055	-0.124676	-0.0687682	-0.00248451	-0.0171666	-0.00400196	-0.00309927
						9	Ag-HEC	0.05	200	1	TEXTILE	05:46:00	Number	dN/dLog10(Dpi), [1/cm3]	17.0656	143.139	103.224	50.2466	28.0282	12.2068	5.01825	8.53822	3.81479	1.47067	1.92175	0.554055	0.24964	0.062719	-0.0992665	-0.245498	-0.208558	-0.11205	-0.0560275	-0.0346196	-0.0260063	-0.0113577	0.00160347	-0.017591	-0.00980869
						10	Ag-HEC	0.05	400	2	TEXTILE	06:57:00	Number	dN/dLog10(Dpi), [1/cm3]	10.9488	61.1427	57.1392	30.9246	21.891	13.3035	8.84692	10.5163	6.47181	4.20694	4.27405	1.57207	1.0163	0.245902	0.258807	0.166134	0.176558	0.185432	0.125068	0.13357	0.0257632	-0.00593534	-0.0055376	-0.00144587	0.00831805
						11	Ag-HEC	0.1	200	1	TEXTILE	05:48:00	Number	dN/dLog10(Dpi), [1/cm3]	57.746	562.255	440.084	189.083	55.5472	12.4532	3.00072	-1.67309	-3.58775	-2.4097	-1.61461	-1.19818	-0.709498	-0.195963	-0.427609	-0.155196	-0.185813	-0.293441	-0.240758	-0.287149	-0.132035	-0.0449767	-0.0199132	-0.0217707	-0.0187019
						12	Ag-HEC	0.1	400	2	TEXTILE	06:59:00	Number	dN/dLog10(Dpi), [1/cm3]	7.79152	-3.72323	20.6391	28.1129	36.2331	24.7414	12.0969	13.1997	6.37125	2.34292	3.9879	1.17444	1.08807	0.035801	0.298093	0.0349253	-0.0504546	-0.0355326	-0.0495628	-0.0141529	-0.0204298	0.00152893	0.00660252	0.0126216	0.0177101
						7 to 12	Ag-HEC	Varying	Varying	Varying	Textile		Number	dN/dLog10(Dpi), [1/cm3]	16.6413	129.056	107.657	54.696	28.1746	14.0687	6.78653	7.24044	2.6451	0.85435	1.52246	0.26811	0.182793	-0.109942	-0.267449	-0.257424	-0.289874	-0.317004	-0.29219	-0.332703	-0.123723	-0.0345349	-0.0235194	-0.018977	-0.00763776
						Table S4.2: Mass distributions are calculated from the number size distributions by using TiO2 and Ag-HEC process emission densities and spherical particle assumption
						Test No.	Material	Concentration, [wt.%]	Suspension flow rate, [mL/min]	Nozzle	Substrate	Spray time, [mm:ss]	Distribution	Bin concentration normalized with logartihmic width of the bin i	Total concentration
						1	TiO2-N	1	200	1	PMMA	06:15:00	Number	dm/dLog10(Dpi) , [ug/m3]	-21.0439	5.80349	7.33665	5.17624	4.38467	4.37621	3.66863	5.0056	6.1728	5.49884	5.17595	1.3804	0.778773	0.487564	0.767393	0.661643	-2.04609	-7.63852	-15.2075	-41.8137	-39.2134	-32.9825	-50.6087	-78.0483	-59.9718
						2	TiO2-N	1	400	2	PMMA	07:33:00	Number	dm/dLog10(Dpi) , [ug/m3]	-12.1136	4.68789	5.80808	3.51194	2.99918	3.55389	3.60499	4.73126	6.83412	6.78108	6.50588	1.52932	0.903197	0.282032	1.97569	-0.670034	2.00064	-5.34618	-13.8153	-22.5464	-20.6156	-22.2881	-17.3712	-66.7315	-38.8629
						3	TiO2-N	1	800	4	PMMA	09:38:00	Number	dm/dLog10(Dpi) , [ug/m3]	8.67925	2.38787	4.4323	4.3456	5.07048	8.3848	9.34635	13.4566	19.3109	17.4686	14.5789	3.86254	2.18152	2.84365	3.71798	3.30804	-0.710066	4.08587	3.53226	5.45158	7.47816	0.762145	-3.53918	-9.00796	18.1751
						4	TiO2-N	1	200	1	TEXTILE	06:18:00	Number	dm/dLog10(Dpi) , [ug/m3]	-9.52211	-1.1979	-0.99508	-0.388237	-0.423061	-0.854787	-1.32342	-1.40231	-2.5902	-1.84176	0.175135	-0.304834	-0.421095	-0.790715	-1.88223	-3.02999	-5.26371	-7.16409	-10.4851	-12.2093	-7.61034	-11.9609	-14.5328	-24.7944	-21.518
						5	TiO2-N	1	400	2	TEXTILE	07:49:00	Number	dm/dLog10(Dpi) , [ug/m3]	15.6133	-2.33957	-2.48011	-1.16078	0.821075	5.39963	6.66153	9.39648	15.4985	13.976	11.6865	2.87853	1.61966	1.97133	4.87934	4.2754	6.65424	10.2164	12.7279	23.2641	17.6293	11.614	26.2117	35.4337	9.90641
						6	TiO2-N	1	800	4	TEXTILE	10:02:00	Number	dm/dLog10(Dpi) , [ug/m3]	-43.8551	6.13719	8.96705	6.80459	6.5423	10.0207	11.6786	15.0326	20.5197	18.6779	14.6679	2.95154	-0.415679	-0.425599	-3.71052	-8.5585	-21.3858	-35.421	-51.2012	-101.116	-80.1148	-50.2906	-84.3788	-142.707	-92.7229
						1 to 6	TiO2-N	1	Varying	Varying	PMMA & Textile		Mass	dm/dLog10(Dpi) , [ug/m3]	-10.3737	2.57983	3.84481	3.04822	3.23244	5.14674	5.60612	7.70338	10.9576	10.0934	8.79838	2.04959	0.774397	0.728043	0.957941	-0.668909	-3.45846	-6.87791	-12.4082	-24.8283	-20.4078	-17.5243	-24.0365	-47.6426	-30.8323
						7	Ag-HEC	0.01	200	1	TEXTILE	06:10:00	Number	dm/dLog10(Dpi) , [ug/m3]	-128.185	-2.14114	-1.88946	-0.618048	0.232391	1.16724	0.905869	1.47415	0.0129549	-0.774924	-0.213489	-0.877908	-1.57672	-4.87482	-19.5984	-34.1597	-74.3355	-138.913	-207.178	-363.579	-221.587	-134.576	-153.207	-170.708	-136.969
						8	Ag-HEC	0.01	400	2	TEXTILE	05:52:00	Number	dm/dLog10(Dpi) , [ug/m3]	-9.66153	2.75399	3.74647	3.35728	3.7582	3.56104	2.74019	3.99744	1.84669	0.321871	0.873808	0.017577	-0.287512	-1.16763	-3.19007	-2.45834	-3.88814	-12.3803	-16.3511	-27.1565	-29.2556	-2.32216	-24.6479	-8.36453	-10.548
						9	Ag-HEC	0.05	200	1	TEXTILE	05:46:00	Number	dm/dLog10(Dpi) , [ug/m3]	-8.12705	7.61186	7.712	4.61724	4.08989	2.65886	1.55633	3.63236	2.53319	1.37457	2.24338	0.965461	0.849622	0.468966	-1.3838	-6.68421	-11.0907	-10.2964	-8.17555	-7.54073	-11.0637	-10.6156	2.30227	-36.7672	-33.3828
						10	Ag-HEC	0.05	400	2	TEXTILE	06:57:00	Number	dm/dLog10(Dpi) , [ug/m3]	10.8529	3.25145	4.26894	2.84171	3.19434	2.89772	2.74373	4.47391	4.29756	3.93204	4.98937	2.73938	3.45887	1.83867	3.60785	4.52334	9.389	17.0396	18.2499	29.0939	10.9603	-5.5475	-7.95092	-3.02202	28.3096
						11	Ag-HEC	0.1	200	1	TEXTILE	05:48:00	Number	dm/dLog10(Dpi) , [ug/m3]	-26.0729	29.8996	32.8792	17.3751	8.10548	2.71252	0.930626	-0.711771	-2.38242	-2.25224	-1.88484	-2.08787	-2.4147	-1.46527	-5.961	-4.22553	-9.88115	-26.9648	-35.1315	-62.546	-56.1708	-42.0377	-28.5915	-45.5031	-63.6499
						12	Ag-HEC	0.1	400	2	TEXTILE	06:59:00	Number	dm/dLog10(Dpi) , [ug/m3]	7.38818	-0.197994	1.54197	2.58334	5.28716	5.3891	3.75165	5.61546	4.23078	2.18982	4.65533	2.04651	3.70313	0.267693	4.1555	0.950917	-2.68308	-3.26515	-7.23222	-3.08274	-8.69133	1.42902	9.47994	26.3804	60.2745
						7 to 12	Ag-HEC	Varying	Varying	Varying	Textile		Mass	dm/dLog10(Dpi) , [ug/m3]	-25.6343	6.86296	8.04319	5.0261	4.11124	3.06441	2.10473	3.08026	1.75646	0.798524	1.77726	0.467192	0.622115	-0.822065	-3.72832	-7.00893	-15.4149	-29.13	-42.6365	-72.4685	-52.6347	-32.2783	-33.7692	-39.664	-25.9943
						Figure S4.1: FF particle number size and mass size distributions for TiO2-N experiments. Grey lines shows the respective NF average size distributions.									Figure S4.2: FF particle number size and mass size distributions for Ag-HEC experiments. Grey lines shows the respective NF average size distributions.

## Sheet: S5. Emission rate
		Table S5.1: Parametrization of individual spray tests for emission rate quantification. Modelled concentrations are shown in Figures S5.1-S5.22. Geometric Mean (GM) and Geometric Standard Deviation (GSD) are given next to the concentration distribution figures.														Table S5.2: Mass emission rates assigned by setting the emission rate to produce NF concentration corresponding the measured NF concentration.
																Test No.	Material	Emission rate [mg/min]	Modelled concentration, [mg/m3]	Ratio, [%]
			Parametrization of Test No. 1													1	TiO2-N	1.3	36	98.8225
																2	TiO2-N	2	61	98.0428
					Model	Model name										3	TiO2-N	5.9	203	99.7894
					M205	2Box.CE.Gv										4	TiO2-N	0.9	26	96.6587
																5	TiO2-N	1.6	50	98.9401
			Variable	Units	Var Model	P1Name	P1	P2Name	P2	P3Name	P3					6	TiO2-N	4.5	183	99.2003
		T1.1	Frequency	/shift	ConstantInt	K =	1									7	Ag-HEC	N/A	N/A	N/A
			Duration	min	ConstantInt	K =	7									8	Ag-HEC	0.8	19	94.0497
			G	mg/min	Constant	K =	1.3									9	Ag-HEC	1.3	31	101.55
			Q	ACH	Uniform	Min =	2.5	Max =	10							10	Ag-HEC	1.9	53	98.9325
			V	m³	Uniform	Min =	1200	Max =	1470							11	Ag-HEC	2.2	53	100.37
			Vn	m³	Triangular	Mode =	3	Min =	1	Max =	8					12	Ag-HEC	2.6	74	96.3502
			ß	m³/min	Lognormal	GM =	5.588	GSD =	1.477
			tg	min	Constant	K =	2
			t1	min	Constant	K =	0
			t2	min	Constant	K =	7
		T1.2	Frequency	/shift	ConstantInt	K =	1
			Duration	min	ConstantInt	K =	8
			G	mg/min	Constant	K =	1.3
			Q	ACH	Uniform	Min =	2.5	Max =	10
			V	m³	Uniform	Min =	1200	Max =	1470											GM:	0.036
			Vn	m³	Triangular	Mode =	3	Min =	1	Max =	8									GSD:	1.22
			ß	m³/min	Lognormal	GM =	5.588	GSD =	1.477
			tg	min	Constant	K =	2
			t1	min	Constant	K =	0
			t2	min	Constant	K =	8
		T1.3	Frequency	/shift	ConstantInt	K =	1
			Duration	min	ConstantInt	K =	8
			G	mg/min	Constant	K =	1.3
			Q	ACH	Uniform	Min =	2.5	Max =	10
			V	m³	Uniform	Min =	1200	Max =	1470
			Vn	m³	Triangular	Mode =	3	Min =	1	Max =	8
			ß	m³/min	Lognormal	GM =	5.588	GSD =	1.477
			tg	min	Uniform	Min =	1	Max =	2
			t1	min	Constant	K =	0
			t2	min	Constant	K =	8						Figure S5.1: Test 1 concentration distribution
		T1.4	Frequency	/shift	ConstantInt	K =	1
			Duration	min	ConstantInt	K =	8
			G	mg/min	Constant	K =	1.3
			Q	ACH	Uniform	Min =	2.5	Max =	10
			V	m³	Uniform	Min =	1200	Max =	1470
			Vn	m³	Triangular	Mode =	3	Min =	1	Max =	8
			ß	m³/min	Lognormal	GM =	5.588	GSD =	1.477
			tg	min	Uniform	Min =	1	Max =	2
			t1	min	Constant	K =	0
			t2	min	Constant	K =	8
		Break	Frequency	/shift	ConstantInt	K =	1
			Duration	min	UniformInt	Min =	18	Max =	19
			G	mg/min	Constant	K =	0
			Q	ACH	Uniform	Min =	2.5	Max =	10
			V	m³	Uniform	Min =	1200	Max =	1470
			Vn	m³	Triangular	Mode =	3	Min =	1	Max =	8
			ß	m³/min	Lognormal	GM =	5.588	GSD =	1.477				Figure S5.2: Test 1 concentration time series
			tg	min	Constant	K =	0
			t1	min	Constant	K =	0
			t2	min	Constant	K =	19
			Parametrization of Test No. 2
					Model	Model name
					M205	2Box.CE.Gv
			Variable	Units	Var Model	P1Name	P1	P2Name	P2	P3Name	P3
		T2.1	Frequency	/shift	ConstantInt	K =	1
			Duration	min	ConstantInt	K =	7
			G	mg/min	Constant	K =	2
			Q	ACH	Uniform	Min =	2.5	Max =	10
			V	m³	Uniform	Min =	1200	Max =	1470
			Vn	m³	Triangular	Mode =	3	Min =	1	Max =	8
			ß	m³/min	Lognormal	GM =	5.588	GSD =	1.477
			tg	min	Constant	K =	2
			t1	min	Constant	K =	0
			t2	min	Constant	K =	7
		T2.2	Frequency	/shift	ConstantInt	K =	1
			Duration	min	ConstantInt	K =	8
			G	mg/min	Constant	K =	2
			Q	ACH	Uniform	Min =	2.5	Max =	10
			V	m³	Uniform	Min =	1200	Max =	1470
			Vn	m³	Triangular	Mode =	3	Min =	1	Max =	8
			ß	m³/min	Lognormal	GM =	5.588	GSD =	1.477
			tg	min	Constant	K =	2													GM:	0.061
			t1	min	Constant	K =	0													GSD:	1.213
			t2	min	Constant	K =	8
		T2.3	Frequency	/shift	ConstantInt	K =	1
			Duration	min	ConstantInt	K =	7
			G	mg/min	Constant	K =	2
			Q	ACH	Uniform	Min =	2.5	Max =	10
			V	m³	Uniform	Min =	1200	Max =	1470
			Vn	m³	Triangular	Mode =	3	Min =	1	Max =	8
			ß	m³/min	Lognormal	GM =	5.588	GSD =	1.477
			tg	min	Constant	K =	2
			t1	min	Constant	K =	0
			t2	min	Constant	K =	7
		T2.4	Frequency	/shift	ConstantInt	K =	1
			Duration	min	ConstantInt	K =	8
			G	mg/min	Constant	K =	2						Figure S5.3: Test 2 concentration distribution
			Q	ACH	Uniform	Min =	2.5	Max =	10
			V	m³	Uniform	Min =	1200	Max =	1470
			Vn	m³	Triangular	Mode =	3	Min =	1	Max =	8
			ß	m³/min	Lognormal	GM =	5.588	GSD =	1.477
			tg	min	Uniform	Min =	1	Max =	2
			t1	min	Constant	K =	0
			t2	min	Constant	K =	8
		Break	Frequency	/shift	ConstantInt	K =	1
			Duration	min	UniformInt	Min =	18	Max =	19
			G	mg/min	Constant	K =	0
			Q	ACH	Uniform	Min =	2.5	Max =	10
			V	m³	Uniform	Min =	1200	Max =	1470
			Vn	m³	Triangular	Mode =	3	Min =	1	Max =	8
			ß	m³/min	Lognormal	GM =	5.588	GSD =	1.477
			tg	min	Constant	K =	0
			t1	min	Constant	K =	0
			t2	min	Constant	K =	19
													Figure S5.4: Test 2 concentration time series
			Parametrization of Test No. 3
					Model	Model name
					M205	2Box.CE.Gv
			Variable	Units	Var Model	P1Name	P1	P2Name	P2	P3Name	P3
		T3.1	Frequency	/shift	ConstantInt	K =	1
			Duration	min	ConstantInt	K =	12
			G	mg/min	Constant	K =	5.9
			Q	ACH	Uniform	Min =	2.5	Max =	10
			V	m³	Uniform	Min =	1200	Max =	1470
			Vn	m³	Triangular	Mode =	3	Min =	1	Max =	8
			ß	m³/min	Lognormal	GM =	5.588	GSD =	1.477
			tg	min	Constant	K =	2
			t1	min	Constant	K =	0
			t2	min	Constant	K =	12
		T3.2	Frequency	/shift	ConstantInt	K =	1
			Duration	min	ConstantInt	K =	8
			G	mg/min	Constant	K =	5.9
			Q	ACH	Uniform	Min =	2.5	Max =	10
			V	m³	Uniform	Min =	1200	Max =	1470
			Vn	m³	Triangular	Mode =	3	Min =	1	Max =	8
			ß	m³/min	Lognormal	GM =	5.588	GSD =	1.477
			tg	min	Constant	K =	3													GM:	0.203
			t1	min	Constant	K =	0													GSD:	1.228
			t2	min	Constant	K =	8
		T3.3	Frequency	/shift	ConstantInt	K =	1
			Duration	min	ConstantInt	K =	8
			G	mg/min	Constant	K =	5.9
			Q	ACH	Uniform	Min =	2.5	Max =	10
			V	m³	Uniform	Min =	1200	Max =	1470
			Vn	m³	Triangular	Mode =	3	Min =	1	Max =	8
			ß	m³/min	Lognormal	GM =	5.588	GSD =	1.477
			tg	min	Constant	K =	3
			t1	min	Constant	K =	0
			t2	min	Constant	K =	7
		T3.4	Frequency	/shift	ConstantInt	K =	1
			Duration	min	ConstantInt	K =	8
			G	mg/min	Constant	K =	5.9						Figure S5.5: Test 3 concentration distribution
			Q	ACH	Uniform	Min =	2.5	Max =	10
			V	m³	Uniform	Min =	1200	Max =	1470
			Vn	m³	Triangular	Mode =	3	Min =	1	Max =	8
			ß	m³/min	Lognormal	GM =	5.588	GSD =	1.477
			tg	min	Uniform	Min =	1	Max =	2
			t1	min	Constant	K =	0
			t2	min	Constant	K =	8
		Break	Frequency	/shift	ConstantInt	K =	1
			Duration	min	UniformInt	Min =	18	Max =	19
			G	mg/min	Constant	K =	0
			Q	ACH	Uniform	Min =	2.5	Max =	10
			V	m³	Uniform	Min =	1200	Max =	1470
			Vn	m³	Triangular	Mode =	3	Min =	1	Max =	8
			ß	m³/min	Lognormal	GM =	5.588	GSD =	1.477
			tg	min	Constant	K =	0
			t1	min	Constant	K =	0
			t2	min	Constant	K =	19
													Figure S5.6: Test 3 concentration time series
			Parametrization of Test No. 4
					Model	Model name
					M205	2Box.CE.Gv
			Variable	Units	Var Model	P1Name	P1	P2Name	P2	P3Name	P3
		T4.1	Frequency	/shift	ConstantInt	K =	1
			Duration	min	ConstantInt	K =	7
			G	mg/min	Constant	K =	0.9
			Q	ACH	Uniform	Min =	2.5	Max =	10
			V	m³	Uniform	Min =	1200	Max =	1470
			Vn	m³	Triangular	Mode =	3	Min =	1	Max =	8
			ß	m³/min	Lognormal	GM =	5.588	GSD =	1.477
			tg	min	Constant	K =	2													GM:	0.026
			t1	min	Constant	K =	0													GSD:	1.229
			t2	min	Constant	K =	7
		T4.2	Frequency	/shift	ConstantInt	K =	1
			Duration	min	ConstantInt	K =	7
			G	mg/min	Constant	K =	0.9
			Q	ACH	Uniform	Min =	2.5	Max =	10
			V	m³	Uniform	Min =	1200	Max =	1470
			Vn	m³	Triangular	Mode =	3	Min =	1	Max =	8
			ß	m³/min	Lognormal	GM =	5.588	GSD =	1.477
			tg	min	Constant	K =	2
			t1	min	Constant	K =	0
			t2	min	Constant	K =	7
		T4.3	Frequency	/shift	ConstantInt	K =	1
			Duration	min	ConstantInt	K =	7
			G	mg/min	Constant	K =	0.9						Figure S5.7: Test 2 concentration distribution
			Q	ACH	Uniform	Min =	2.5	Max =	10
			V	m³	Uniform	Min =	1200	Max =	1470
			Vn	m³	Triangular	Mode =	3	Min =	1	Max =	8
			ß	m³/min	Lognormal	GM =	5.588	GSD =	1.477
			tg	min	Uniform	Min =	1	Max =	2
			t1	min	Constant	K =	0
			t2	min	Constant	K =	7
		T4.4	Frequency	/shift	ConstantInt	K =	1
			Duration	min	ConstantInt	K =	8
			G	mg/min	Constant	K =	0.9
			Q	ACH	Uniform	Min =	2.5	Max =	10
			V	m³	Uniform	Min =	1200	Max =	1470
			Vn	m³	Triangular	Mode =	3	Min =	1	Max =	8
			ß	m³/min	Lognormal	GM =	5.588	GSD =	1.477
			tg	min	Uniform	Min =	1	Max =	2
			t1	min	Constant	K =	0
			t2	min	Constant	K =	8
		Break	Frequency	/shift	ConstantInt	K =	1						Figure S5.8: Test 2 concentration time series
			Duration	min	UniformInt	Min =	18	Max =	19
			G	mg/min	Constant	K =	0
			Q	ACH	Uniform	Min =	2.5	Max =	10
			V	m³	Uniform	Min =	1200	Max =	1470
			Vn	m³	Triangular	Mode =	3	Min =	1	Max =	8
			ß	m³/min	Lognormal	GM =	5.588	GSD =	1.477
			tg	min	Constant	K =	0
			t1	min	Constant	K =	0
			t2	min	Constant	K =	19
			Parametrization of Test No. 5
					Model	Model name
					M205	2Box.CE.Gv
			Variable	Units	Var Model	P1Name	P1	P2Name	P2	P3Name	P3
		T5.1	Frequency	/shift	ConstantInt	K =	1
			Duration	min	ConstantInt	K =	8
			G	mg/min	Constant	K =	1.6
			Q	ACH	Uniform	Min =	2.5	Max =	10
			V	m³	Uniform	Min =	1200	Max =	1470
			Vn	m³	Triangular	Mode =	3	Min =	1	Max =	8
			ß	m³/min	Lognormal	GM =	5.588	GSD =	1.477
			tg	min	Constant	K =	2													GM:	0.05
			t1	min	Constant	K =	0													GSD:	1.21
			t2	min	Constant	K =	8
		T5.2	Frequency	/shift	ConstantInt	K =	1
			Duration	min	ConstantInt	K =	8
			G	mg/min	Constant	K =	1.6
			Q	ACH	Uniform	Min =	2.5	Max =	10
			V	m³	Uniform	Min =	1200	Max =	1470
			Vn	m³	Triangular	Mode =	3	Min =	1	Max =	8
			ß	m³/min	Lognormal	GM =	5.588	GSD =	1.477
			tg	min	Constant	K =	2
			t1	min	Constant	K =	0
			t2	min	Constant	K =	8
		T5.3	Frequency	/shift	ConstantInt	K =	1
			Duration	min	ConstantInt	K =	8
			G	mg/min	Constant	K =	1.6						Figure S5.9: Test 5 concentration distribution
			Q	ACH	Uniform	Min =	2.5	Max =	10
			V	m³	Uniform	Min =	1200	Max =	1470
			Vn	m³	Triangular	Mode =	3	Min =	1	Max =	8
			ß	m³/min	Lognormal	GM =	5.588	GSD =	1.477
			tg	min	Constant	K =	2
			t1	min	Constant	K =	0
			t2	min	Constant	K =	8
		T5.4	Frequency	/shift	ConstantInt	K =	1
			Duration	min	ConstantInt	K =	8
			G	mg/min	Constant	K =	1.6
			Q	ACH	Uniform	Min =	2.5	Max =	10
			V	m³	Uniform	Min =	1200	Max =	1470
			Vn	m³	Triangular	Mode =	3	Min =	1	Max =	8
			ß	m³/min	Lognormal	GM =	5.588	GSD =	1.477
			tg	min	Constant	K =	2
			t1	min	Constant	K =	0
			t2	min	Constant	K =	8
		Break	Frequency	/shift	ConstantInt	K =	1						Figure S5.10: Test 5 concentration time series
			Duration	min	UniformInt	Min =	18	Max =	19
			G	mg/min	Constant	K =	0
			Q	ACH	Uniform	Min =	2.5	Max =	10
			V	m³	Uniform	Min =	1200	Max =	1470
			Vn	m³	Triangular	Mode =	3	Min =	1	Max =	8
			ß	m³/min	Lognormal	GM =	5.588	GSD =	1.477
			tg	min	Constant	K =	0
			t1	min	Constant	K =	0
			t2	min	Constant	K =	19
			Parametrization of Test No. 6
					Model	Model name
					M205	2Box.CE.Gv
			Variable	Units	Var Model	P1Name	P1	P2Name	P2	P3Name	P3
		T6.1	Frequency	/shift	ConstantInt	K =	1
			Duration	min	ConstantInt	K =	7
			G	mg/min	Constant	K =	4.5
			Q	ACH	Uniform	Min =	2.5	Max =	10
			V	m³	Uniform	Min =	1200	Max =	1470
			Vn	m³	Triangular	Mode =	3	Min =	1	Max =	8
			ß	m³/min	Lognormal	GM =	5.588	GSD =	1.477
			tg	min	Uniform	Min =	2	Max =	3
			t1	min	Constant	K =	0
			t2	min	Constant	K =	7
		T6.2	Frequency	/shift	ConstantInt	K =	1
			Duration	min	ConstantInt	K =	8
			G	mg/min	Constant	K =	4.5
			Q	ACH	Uniform	Min =	2.5	Max =	10
			V	m³	Uniform	Min =	1200	Max =	1470
			Vn	m³	Triangular	Mode =	3	Min =	1	Max =	8
			ß	m³/min	Lognormal	GM =	5.588	GSD =	1.477
			tg	min	Uniform	Min =	2	Max =	3											GM:	0.179
			t1	min	Constant	K =	0													GSD:	1.222
			t2	min	Constant	K =	8
		T6.3	Frequency	/shift	ConstantInt	K =	1
			Duration	min	ConstantInt	K =	8
			G	mg/min	Constant	K =	4.5
			Q	ACH	Uniform	Min =	2.5	Max =	10
			V	m³	Uniform	Min =	1200	Max =	1470
			Vn	m³	Triangular	Mode =	3	Min =	1	Max =	8
			ß	m³/min	Lognormal	GM =	5.588	GSD =	1.477
			tg	min	Uniform	Min =	2	Max =	3
			t1	min	Constant	K =	0
			t2	min	Constant	K =	8
		T6.4	Frequency	/shift	ConstantInt	K =	1
			Duration	min	ConstantInt	K =	8
			G	mg/min	Constant	K =	4.5						Figure S5.11: Test 6 concentration distribution
			Q	ACH	Uniform	Min =	2.5	Max =	10
			V	m³	Uniform	Min =	1200	Max =	1470
			Vn	m³	Triangular	Mode =	3	Min =	1	Max =	8
			ß	m³/min	Lognormal	GM =	5.588	GSD =	1.477
			tg	min	Uniform	Min =	2	Max =	3
			t1	min	Constant	K =	0
			t2	min	Constant	K =	8
		Break	Frequency	/shift	ConstantInt	K =	1
			Duration	min	UniformInt	Min =	18	Max =	19
			G	mg/min	Constant	K =	0
			Q	ACH	Uniform	Min =	2.5	Max =	10
			V	m³	Uniform	Min =	1200	Max =	1470
			Vn	m³	Triangular	Mode =	3	Min =	1	Max =	8
			ß	m³/min	Lognormal	GM =	5.588	GSD =	1.477
			tg	min	Constant	K =	0
			t1	min	Constant	K =	0
			t2	min	Constant	K =	19
													Figure S5.12: Test 6 concentration time series
			Parametrization of Test No. 8. NOTE: Test 7 concentration was too low to estimate the emission rate.
					Model	Model name
					M205	2Box.CE.Gv
			Variable	Units	Var Model	P1Name	P1	P2Name	P2	P3Name	P3
		T8.1	Frequency	/shift	ConstantInt	K =	1
			Duration	min	ConstantInt	K =	7
			G	mg/min	Constant	K =	0.8
			Q	ACH	Uniform	Min =	2.5	Max =	10
			V	m³	Uniform	Min =	1200	Max =	1470
			Vn	m³	Triangular	Mode =	3	Min =	1	Max =	8
			ß	m³/min	Lognormal	GM =	5.588	GSD =	1.477
			tg	min	Uniform	Min =	1	Max =	2
			t1	min	Constant	K =	0
			t2	min	Constant	K =	7
		T8.2	Frequency	/shift	ConstantInt	K =	1
			Duration	min	ConstantInt	K =	8
			G	mg/min	Constant	K =	0.8
			Q	ACH	Uniform	Min =	2.5	Max =	10
			V	m³	Uniform	Min =	1200	Max =	1470
			Vn	m³	Triangular	Mode =	3	Min =	1	Max =	8
			ß	m³/min	Lognormal	GM =	5.588	GSD =	1.477
			tg	min	Uniform	Min =	1	Max =	2											GM:	0.019
			t1	min	Constant	K =	0													GSD:	1.234
			t2	min	Constant	K =	8
		T8.3	Frequency	/shift	ConstantInt	K =	1
			Duration	min	ConstantInt	K =	8
			G	mg/min	Constant	K =	0.8
			Q	ACH	Uniform	Min =	2.5	Max =	10
			V	m³	Uniform	Min =	1200	Max =	1470
			Vn	m³	Triangular	Mode =	3	Min =	1	Max =	8
			ß	m³/min	Lognormal	GM =	5.588	GSD =	1.477
			tg	min	Uniform	Min =	1	Max =	2
			t1	min	Constant	K =	0
			t2	min	Constant	K =	8
		T8.4	Frequency	/shift	ConstantInt	K =	1
			Duration	min	ConstantInt	K =	8
			G	mg/min	Constant	K =	0.8						Figure S5.13: Test 8 concentration distribution
			Q	ACH	Uniform	Min =	2.5	Max =	10
			V	m³	Uniform	Min =	1200	Max =	1470
			Vn	m³	Triangular	Mode =	3	Min =	1	Max =	8
			ß	m³/min	Lognormal	GM =	5.588	GSD =	1.477
			tg	min	Uniform	Min =	1	Max =	2
			t1	min	Constant	K =	0
			t2	min	Constant	K =	8
		Break	Frequency	/shift	ConstantInt	K =	1
			Duration	min	ConstantInt	K =	19
			G	mg/min	Constant	K =	0
			Q	ACH	Uniform	Min =	2.5	Max =	10
			V	m³	Uniform	Min =	1200	Max =	1470
			Vn	m³	Triangular	Mode =	3	Min =	1	Max =	8
			ß	m³/min	Lognormal	GM =	5.588	GSD =	1.477
			tg	min	Constant	K =	0
			t1	min	Constant	K =	0
			t2	min	Constant	K =	19
													Figure S5.14: Test 8 concentration time series
			Parametrization of Test No. 9
					Model	Model name
					M205	2Box.CE.Gv
			Variable	Units	Var Model	P1Name	P1	P2Name	P2	P3Name	P3
		T9.1	Frequency	/shift	ConstantInt	K =	1
			Duration	min	ConstantInt	K =	6
			G	mg/min	Constant	K =	1.3
			Q	ACH	Uniform	Min =	2.5	Max =	10
			V	m³	Uniform	Min =	1200	Max =	1470
			Vn	m³	Triangular	Mode =	3	Min =	1	Max =	8
			ß	m³/min	Lognormal	GM =	5.588	GSD =	1.477
			tg	min	Uniform	Min =	1	Max =	2
			t1	min	Constant	K =	0
			t2	min	Constant	K =	6
		T9.2	Frequency	/shift	ConstantInt	K =	1
			Duration	min	ConstantInt	K =	8
			G	mg/min	Constant	K =	1.3
			Q	ACH	Uniform	Min =	2.5	Max =	10
			V	m³	Uniform	Min =	1200	Max =	1470
			Vn	m³	Triangular	Mode =	3	Min =	1	Max =	8
			ß	m³/min	Lognormal	GM =	5.588	GSD =	1.477
			tg	min	Uniform	Min =	1	Max =	2											GM:	0.031
			t1	min	Constant	K =	0													GSD:	1.231
			t2	min	Constant	K =	8
		T9.3	Frequency	/shift	ConstantInt	K =	1
			Duration	min	ConstantInt	K =	8
			G	mg/min	Constant	K =	1.3
			Q	ACH	Uniform	Min =	2.5	Max =	10
			V	m³	Uniform	Min =	1200	Max =	1470
			Vn	m³	Triangular	Mode =	3	Min =	1	Max =	8
			ß	m³/min	Lognormal	GM =	5.588	GSD =	1.477
			tg	min	Uniform	Min =	1	Max =	2
			t1	min	Constant	K =	0
			t2	min	Constant	K =	8
		T9.4	Frequency	/shift	ConstantInt	K =	1
			Duration	min	ConstantInt	K =	8
			G	mg/min	Constant	K =	1.3						Figure S5.15: Test 9 concentration distribution
			Q	ACH	Uniform	Min =	2.5	Max =	10
			V	m³	Uniform	Min =	1200	Max =	1470
			Vn	m³	Triangular	Mode =	3	Min =	1	Max =	8
			ß	m³/min	Lognormal	GM =	5.588	GSD =	1.477
			tg	min	Uniform	Min =	1	Max =	2
			t1	min	Constant	K =	0
			t2	min	Constant	K =	8
		Break	Frequency	/shift	ConstantInt	K =	1
			Duration	min	ConstantInt	K =	19
			G	mg/min	Constant	K =	0
			Q	ACH	Uniform	Min =	2.5	Max =	10
			V	m³	Uniform	Min =	1200	Max =	1470
			Vn	m³	Triangular	Mode =	3	Min =	1	Max =	8
			ß	m³/min	Lognormal	GM =	5.588	GSD =	1.477
			tg	min	Constant	K =	0
			t1	min	Constant	K =	0
			t2	min	Constant	K =	19
													Figure S5.16: Test 9 concentration time series
			Parametrization of Test No. 10
					Model	Model name
					M205	2Box.CE.Gv
			Variable	Units	Var Model	P1Name	P1	P2Name	P2	P3Name	P3
		T10.1	Frequency	/shift	ConstantInt	K =	1
			Duration	min	ConstantInt	K =	6
			G	mg/min	Constant	K =	1.9
			Q	ACH	Uniform	Min =	2.5	Max =	10
			V	m³	Uniform	Min =	1200	Max =	1470
			Vn	m³	Triangular	Mode =	3	Min =	1	Max =	8
			ß	m³/min	Lognormal	GM =	5.588	GSD =	1.477
			tg	min	Constant	K =	2
			t1	min	Constant	K =	0
			t2	min	Constant	K =	6
		T10.2	Frequency	/shift	ConstantInt	K =	1
			Duration	min	ConstantInt	K =	8
			G	mg/min	Constant	K =	1.9
			Q	ACH	Uniform	Min =	2.5	Max =	10
			V	m³	Uniform	Min =	1200	Max =	1470
			Vn	m³	Triangular	Mode =	3	Min =	1	Max =	8
			ß	m³/min	Lognormal	GM =	5.588	GSD =	1.477
			tg	min	Constant	K =	2													GM:	0.053
			t1	min	Constant	K =	0													GSD:	1.219
			t2	min	Constant	K =	8
		T10.3	Frequency	/shift	ConstantInt	K =	1
			Duration	min	ConstantInt	K =	8
			G	mg/min	Constant	K =	1.9
			Q	ACH	Uniform	Min =	2.5	Max =	10
			V	m³	Uniform	Min =	1200	Max =	1470
			Vn	m³	Triangular	Mode =	3	Min =	1	Max =	8
			ß	m³/min	Lognormal	GM =	5.588	GSD =	1.477
			tg	min	Uniform	Min =	1	Max =	2
			t1	min	Constant	K =	0
			t2	min	Constant	K =	8
		T10.4	Frequency	/shift	ConstantInt	K =	1
			Duration	min	ConstantInt	K =	8
			G	mg/min	Constant	K =	1.9						Figure S5.17: Test 10 concentration distribution
			Q	ACH	Uniform	Min =	2.5	Max =	10
			V	m³	Uniform	Min =	1200	Max =	1470
			Vn	m³	Triangular	Mode =	3	Min =	1	Max =	8
			ß	m³/min	Lognormal	GM =	5.588	GSD =	1.477
			tg	min	Uniform	Min =	1	Max =	2
			t1	min	Constant	K =	0
			t2	min	Constant	K =	8
		Break	Frequency	/shift	ConstantInt	K =	1
			Duration	min	ConstantInt	K =	19
			G	mg/min	Constant	K =	0
			Q	ACH	Uniform	Min =	2.5	Max =	10
			V	m³	Uniform	Min =	1200	Max =	1470
			Vn	m³	Triangular	Mode =	3	Min =	1	Max =	8
			ß	m³/min	Lognormal	GM =	5.588	GSD =	1.477
			tg	min	Constant	K =	0
			t1	min	Constant	K =	0
			t2	min	Constant	K =	19
													Figure S5.18: Test 10 concentration time series
			Parametrization of Test No. 11
					Model	Model name
					M205	2Box.CE.Gv
			Variable	Units	Var Model	P1Name	P1	P2Name	P2	P3Name	P3
		T11.1	Frequency	/shift	ConstantInt	K =	1
			Duration	min	ConstantInt	K =	6
			G	mg/min	Constant	K =	2.2
			Q	ACH	Uniform	Min =	2.5	Max =	10
			V	m³	Uniform	Min =	1200	Max =	1470
			Vn	m³	Triangular	Mode =	3	Min =	1	Max =	8
			ß	m³/min	Lognormal	GM =	5.588	GSD =	1.477
			tg	min	Uniform	Min =	1	Max =	2
			t1	min	Constant	K =	0
			t2	min	Constant	K =	6
		T11.2	Frequency	/shift	ConstantInt	K =	1
			Duration	min	ConstantInt	K =	8
			G	mg/min	Constant	K =	2.2
			Q	ACH	Uniform	Min =	2.5	Max =	10
			V	m³	Uniform	Min =	1200	Max =	1470
			Vn	m³	Triangular	Mode =	3	Min =	1	Max =	8
			ß	m³/min	Lognormal	GM =	5.588	GSD =	1.477
			tg	min	Uniform	Min =	1	Max =	2											GM:	0.052
			t1	min	Constant	K =	0													GSD:	1.24
			t2	min	Constant	K =	8
		T11.3	Frequency	/shift	ConstantInt	K =	1
			Duration	min	ConstantInt	K =	8
			G	mg/min	Constant	K =	2.2
			Q	ACH	Uniform	Min =	2.5	Max =	10
			V	m³	Uniform	Min =	1200	Max =	1470
			Vn	m³	Triangular	Mode =	3	Min =	1	Max =	8
			ß	m³/min	Lognormal	GM =	5.588	GSD =	1.477
			tg	min	Uniform	Min =	1	Max =	2
			t1	min	Constant	K =	0
			t2	min	Constant	K =	8
		T11.4	Frequency	/shift	ConstantInt	K =	1
			Duration	min	ConstantInt	K =	8
			G	mg/min	Constant	K =	2.2						Figure S5.19: Test 11 concentration distribution
			Q	ACH	Uniform	Min =	2.5	Max =	10
			V	m³	Uniform	Min =	1200	Max =	1470
			Vn	m³	Triangular	Mode =	3	Min =	1	Max =	8
			ß	m³/min	Lognormal	GM =	5.588	GSD =	1.477
			tg	min	Uniform	Min =	1	Max =	2
			t1	min	Constant	K =	0
			t2	min	Constant	K =	8
		Break	Frequency	/shift	ConstantInt	K =	1
			Duration	min	ConstantInt	K =	19
			G	mg/min	Constant	K =	0
			Q	ACH	Uniform	Min =	2.5	Max =	10
			V	m³	Uniform	Min =	1200	Max =	1470
			Vn	m³	Triangular	Mode =	3	Min =	1	Max =	8
			ß	m³/min	Lognormal	GM =	5.588	GSD =	1.477
			tg	min	Constant	K =	0
			t1	min	Constant	K =	0
			t2	min	Constant	K =	19
													Figure S5.20: Test 11 concentration time series
			Parametrization of Test No. 12
					Model	Model name
					M205	2Box.CE.Gv
			Variable	Units	Var Model	P1Name	P1	P2Name	P2	P3Name	P3
		T12.1	Frequency	/shift	ConstantInt	K =	1
			Duration	min	ConstantInt	K =	6
			G	mg/min	Constant	K =	2.6
			Q	ACH	Uniform	Min =	2.5	Max =	10
			V	m³	Uniform	Min =	1200	Max =	1470
			Vn	m³	Triangular	Mode =	3	Min =	1	Max =	8
			ß	m³/min	Lognormal	GM =	5.588	GSD =	1.477
			tg	min	Constant	K =	2
			t1	min	Constant	K =	0
			t2	min	Constant	K =	6
		T12.2	Frequency	/shift	ConstantInt	K =	1
			Duration	min	ConstantInt	K =	8
			G	mg/min	Constant	K =	2.6
			Q	ACH	Uniform	Min =	2.5	Max =	10
			V	m³	Uniform	Min =	1200	Max =	1470
			Vn	m³	Triangular	Mode =	3	Min =	1	Max =	8
			ß	m³/min	Lognormal	GM =	5.588	GSD =	1.477
			tg	min	Constant	K =	2													GM:	0.074
			t1	min	Constant	K =	0													GSD:	1.23
			t2	min	Constant	K =	8
		T12.3	Frequency	/shift	ConstantInt	K =	1
			Duration	min	ConstantInt	K =	8
			G	mg/min	Constant	K =	2.6
			Q	ACH	Uniform	Min =	2.5	Max =	10
			V	m³	Uniform	Min =	1200	Max =	1470
			Vn	m³	Triangular	Mode =	3	Min =	1	Max =	8
			ß	m³/min	Lognormal	GM =	5.588	GSD =	1.477
			tg	min	Uniform	Min =	1	Max =	2
			t1	min	Constant	K =	0
			t2	min	Constant	K =	8
		T12.4	Frequency	/shift	ConstantInt	K =	1
			Duration	min	ConstantInt	K =	8
			G	mg/min	Constant	K =	2.6						Figure S5.21: Test 12 concentration distribution
			Q	ACH	Uniform	Min =	2.5	Max =	10
			V	m³	Uniform	Min =	1200	Max =	1470
			Vn	m³	Triangular	Mode =	3	Min =	1	Max =	8
			ß	m³/min	Lognormal	GM =	5.588	GSD =	1.477
			tg	min	Uniform	Min =	1	Max =	2
			t1	min	Constant	K =	0
			t2	min	Constant	K =	8
		Break	Frequency	/shift	ConstantInt	K =	1
			Duration	min	ConstantInt	K =	19
			G	mg/min	Constant	K =	0
			Q	ACH	Uniform	Min =	2.5	Max =	10
			V	m³	Uniform	Min =	1200	Max =	1470
			Vn	m³	Triangular	Mode =	3	Min =	1	Max =	8
			ß	m³/min	Lognormal	GM =	5.588	GSD =	1.477
			tg	min	Constant	K =	0
			t1	min	Constant	K =	0
			t2	min	Constant	K =	19
													Figure S5.22: Test 12 concentration time series

## Sheet: S6. Suspension mass flows
			Table S6: Sprayed suspension volumes, mass flows of TiO2 and Ag-HEC NPs to LEV exhaust and room air, calculated transfer efficiencies and emission factors to room and environment.
			Test	No. of nozzles	Concentration, [wt.%]	Spray time per nozzle, [sec]	Volume consumed, [mL]	Suspension mass^, [kg]	Mass flow of NPs, [g-NP/min]	NP-mass, [g]	NP mass flow from chamber to NF from one side, [mg-NP/min]	Transfer efficiency~, Peff (Eq. 2), [%]	Emission factor for NF (eq. 4)~, [mg-NP/g-NP]	Emission factor for LEV emission (Eq. 5)*, [mg-NP/g-NP]
			1	1	1	375	1250	1.03	1.648	10.3	0.572	97.6687	0.694175	22.6191
			2	2	1	229	1523	1.26	1.65066	12.6	0.88	97.6351	1.06624	22.5827
			3	4	1	145	1926	1.59	1.64483	15.9	2.596	97.4181	3.15656	22.6627
			4	1	1	378	1260	1.04	1.65079	10.4	0.396	97.6939	0.479769	22.5808
			5	2	1	235	1563	1.29	1.64681	12.9	0.704	97.651	0.854987	22.6354
			6	4	1	151	2007	1.65	1.63907	16.5	1.98	97.4842	2.416	22.7422
			1 to 6	varying	1		9529	7.86	#DIV/0!	78.6	1.188	97.5918	1.44462	22.6371
			7	1	0.01	370	1233	1.23	0.0199459	0.123	N/A	N/A	N/A	N/A
			8	2	0.01	206	1373	1.37	0.0199515	0.137	0.0088	96.443	0.882141	34.6874
			9	1	0.05	346	1153	1.15	0.099711	0.575	0.0143	99.2772	0.286829	6.9407
			10	2	0.05	209	1390	1.39	0.0997608	0.695	0.0209	99.2644	0.419002	6.93724
			11	1	0.1	348	1160	1.16	0.2	1.16	0.0242	99.6298	0.242	3.46032
			12	2	0.1	210	1397	1.4	0.2	1.4	0.0286	99.6254	0.286	3.46032
			8 to 12	varying	Varying	1689	7706	7.7	#VALUE!	4.09	0.01936	98.848	0.423195	11.0972
								^The amount of suspension consumed during the test				~Includes both NF volumes		*LEV filter filtration efficiency is not included

## Sheet: S7. RWC conditions
		Table S7.1: Reasonable worst-case (RWC) estimates: Two 3-h continuous sprayings during 8-h work shift, where worker is 10% in NF and 90% in FF. Generation rate follows linear distribution within G_min and G_max range and other parametrization follows Table 1 parametrization. Recommended exposure limit (REL) is 300 μg/m3 for TiO2 and 0.9 μg/m3 for Ag.
		Test	G_min, [mg/min]	G_max, [mg/min]	NF, [μg/m3]	GSD	NF 95th, [μg/m3]	FF*, [μg/m3]	GSD	FF 95th*, [μg/m3]	Weighted 95th exposure, [μg/m3]	Weighted 95th NP exposure, [μg/m3]	NF 95th NP exposure/REL	FF 95th NP exposure/REL	Weighted 95th NP exposure/REL
		1	1.3	2.6	282	1.36	466	22	1.51	44	86.2	37.928	0.683467	0.126427	0.126427
		2	2	4	432	1.53	710	34	1.53	68	132.2	58.168	1.04133	0.193893	0.193893
		3	5.9	11.8	1273	1.36	2099	102	1.51	198	388.1	170.764	3.07853	0.569213	0.569213
		4	0.9	1.8	195	1.35	320	16	1.51	30	59	25.96	0.469333	0.0865333	0.0865333
		5	1.6	3.2	345	1.35	567	28	1.51	54	105.3	46.332	0.8316	0.15444	0.15444
		6	4.5	9	969	1.36	1601	78	1.5	152	296.9	130.636	2.34813	0.435453	0.435453
		7	N/A	N/A	N/A	N/A	N/A	N/A	N/A	N/A	N/A	N/A	N/A	N/A	N/A
		8	0.8	1.6	174	1.36	287	14	1.51	26	52.1	0.5731	3.50778	0.317778	0.636778
		9	1.3	2.6	281	1.35	462	28	1.55	60	100.2	1.1022	5.64667	0.733333	1.22467
		10	1.9	3.8	410	1.35	676	32	1.51	64	125.2	1.3772	8.26222	0.782222	1.53022
		11	2.2	4.4	477	1.36	787	38	1.51	74	145.3	1.5983	9.61889	0.904444	1.77589
		12	2.6	5.2	578	1.36	961	44	1.5	88	175.3	1.9283	11.7456	1.07556	2.14256
								*Includes NF1 and NF2
		Table S7.2: Exposures in test 12 Ag-HEC under different RWC conditions. Generation rate follows linear distribution within G_min and G_max range and other parametrization follows Table 1 parametrization.
		Scenario			NF, [μg/m3]	GSD	NF 95th, [μg/m3]	FF*, [μg/m3]	GSD	FF 95th*, [μg/m3]	Weighted 95th exposure, [μg/m3]	Weighted 95th NP exposure, [μg/m3]	NF 95th NP exposure/REL	FF 95th NP exposure/REL	Weighted 95th NP exposure/REL	Ratio NF/NF_test12	Ratio FF/FF_test12	Ratio Weighted 95th exposure
		Test 12 experimental conditions (Table 1)			578	1.36	961	44	1.5	88	175.3	1.9283	11.7456	1.07556	2.14256	1	1	1
		Room volume 600 to 735 m3			607	1.35	995	90	1.5	176	257.9	2.8369	12.1611	2.15111	3.15211	1.05017	2.04545	1.47119
		General ventilation from 1.25 to 5 ACH			606	1.34	982	88	1.5	178	258.4	2.8424	12.0022	2.17556	3.15822	1.04844	2	1.47404
		NF volume triangular distribution min 0.5 m, mode 1.5 m3, max 4 m3			581	1.37	973	44	1.51	88	176.5	1.9415	11.8922	1.07556	2.15722	1.00519	1	1.00685
		NF and FF air flow rate (β) 2.8 m3/min (GSD same)			1145	1.36	1905	46	1.52	90	271.5	2.9865	23.2833	1.1	3.31833	1.98097	1.04545	1.54877
		Room volume 600 to 735 m3; General ventilation 1.25 to 5 ACH; NF min 0.5 m3, mode 1.5 m3, max 4 m3; β = 2.8 m3/min (GSD = 1.477)			1167	1.36	1932	176	1.51	344	502.8	5.5308	23.6133	4.20444	6.14533	2.01903	4	2.86823
								*Includes NF1 and NF2
		Table S7.3: Exposures in test 12 Ag-HEC including LEV at NF with Q = 10 m3/min and 80% reduction in emissions from the chamber to the room under Table 1 conditions and worst case conditions.
		Scenario			NF, [μg/m3]	GSD	NF 95th, [μg/m3]	FF*, [μg/m3]	GSD	FF 95th*, [μg/m3]	Weighted 95th exposure, [μg/m3]	NF 95th NP exposure/REL	FF 95th NP exposure/REL	Weighted NP exposure/REL
		RWC with Table 1 parametrization and LEV at NF with Q = 10 m3/min and 80% reduction in emissions from the chamber to the room.			38.7	1.18	50.8	1.49	1.51	2.93	7.717	0.620889	0.0358111	0.084887
		LEV at NF with Q = 10 m3/min and 80% reduction. Room volume 600 to 735 m3; General ventilation 1.25 to 5 ACH; NF min 0.5 m3, mode 1.5 m3, max 4 m3; β = 2.8 m3/min (GSD same)			47.5	1.16	60.5	2.96	1.45	5.56	11.054	0.739444	0.0679556	0.121594
								*Includes NF1 and NF2

## Sheet: S8. Correlations
																										Table S8: NF mass concentrations in μg/m3 under different process conditions.
																											Spray flow rate, mL/min		Ratio
																										Test	200	400	High/low
																										TiO2 PMMA	44.0466	74.0457	1.68108
																										TiO2 textile	31.1149	61.2486	1.96847
																										Ag, C = 0.01 wt.%	-1.50098	5.49829
																										Ag, C = 0.05 wt.%	9.68627	16.1336	1.66562
																										Ag, C = 0.1 wt.%	16.368	21.9382	1.34031
																												Average	1.66387
																												STD	0.256756
																											Substrate		Ratio
																										Flow rate	PMMA	Textile	PMMA/Textile
																										200	35.5761	25.1313	1.41561
			Figure S8.1: NF particle number concentration as a function of suspension flow rate.							Figure S8.3: NF mass concentration as a function of flow rate.								Figure S8.5: TiO2 emission rate from the chamber to the NF volume as a function of flow rate.								400	59.8061	49.4701	1.20894
																										800	202.573	181.537	1.11588
																												Average	1.24681
																												STD	0.153414
			Figure S8.2: NF particle number concentration as a function of Ag-HEC concentration for suspension flow rate of 200 and 400 mL/min.							Figure S8.4: NF mass concentration as a function of Ag-HEC concentration for suspension flow rate of 200 and 400 mL/min.								Figure S8.6: Ag-HEC emission rate from the chamber to the NF volume as a function of Ag-HEC concentration for suspension flow rates of 200 and 400 mL/min.

## Sheet: S9. MPPD model
				Table S9.1: Deposition fractions and deposited mass rates (µg/min) for each of the process.											Table S9.2: Deposited mass (as µg/day) for each of the process under RWC conditions where worker performs two 3-h spraying tasks during the 8-h work shift and spends during the 8-h work shift 10% at the NF and 90% at FF. The total time in the NF is 36 min.
				Test	Deposition in human airways										Test	Deposition in human airways
					Head		Tracheo-Bronchial		Pulmonary		Total				Test No.	Weighted deposited mass (µg/day)
					Dep. Fraction	Dep. rate (µg/min)	Dep. Fraction	Dep. rate (µg/min)	Dep. Fraction	Dep. rate (µg/min)	Dep. Fraction	Dep. rate (µg/min)				Head	Tracheo-bronchial	Pulmonary	Total
				1	0.2102	0.1665	0.0693	0.05491	0.1627	0.1288	0.4422	0.3503			1	5.994	1.97676	4.6368	4.6
				2	0.0738	0.09705	0.06	0.07889	0.1224	0.1611	0.2561	0.337			2	3.4938	2.84004	5.7996	4.5
				3	0.0506	0.2254	0.0616	0.2746	0.1173	0.5228	0.2295	1.023			3	8.1144	9.8856	18.8208	36.828
				4	0.0506	0.02796	0.0616	0.03406	0.1173	0.06485	0.2295	0.1269			4	1.00656	1.22616	2.3346	4.5684
				5	0.0738	0.08027	0.06	0.06525	0.1224	0.1332	0.2561	0.2787			5	2.88972	2.349	4.7952	10.0332
				6	0.0865	0.3454	0.059	0.2357	0.124	0.4953	0.2695	1.076			6	12.4344	8.4852	17.8308	38.736
				Average	0.0909167	0.157097	0.0619167	0.123902	0.127683	0.251008	0.280483	0.531983			Average	5.65548	4.46046	9.0363	16.5443
				Standard deviation	0.0601412	0.115236	0.00375682	0.103447	0.017385	0.202535	0.0808215	0.40898			Standard deviation	4.14848	3.72409	7.29124	16.5979
				7	N/A	N/A	N/A	N/A	N/A	N/A	N/A	N/A			7	N/A	N/A	N/A	N/A
				8	0.0352	0.01382	0.0901	0.03543	0.1869	0.07347	0.3121	0.1227			8	0.49752	1.27548	2.64492	4.5
				9	0.0781	0.0541	0.0734	0.05085	0.1601	0.1109	0.3117	0.2158			9	1.9476	1.8306	3.9924	7.7688
				10	0.0781	0.0901	0.0734	0.08469	0.1601	0.1847	0.3117	0.3595			10	3.2436	3.04884	6.6492	12.942
				11	0.2322	0.2718	0.078	0.09129	0.1891	0.2213	0.4993	0.5844			11	9.7848	3.28644	7.9668	21.0384
				12	0.3703	0.5809	0.097	0.1522	0.1612	0.2528	0.6285	0.9859			12	20.9124	5.4792	9.1008	35.4924
				Average	0.15878	0.202144	0.08238	0.082892	0.17148	0.168634	0.41266	0.45366			Average	7.27718	2.98411	6.07082	16.3483
				Standard deviation	0.140019	0.233583	0.0106514	0.0451572	0.0151073	0.0750086	0.145423	0.344728			Standard deviation	8.409	1.62566	2.70031	12.3904
